1 Neuraminidase antigenic drift of Influenza A virus H3N2 clade 3c.2a viruses alters virus  
2 replication, enzymatic activity and inhibitory antibody binding.

3

4 Short Title: Influenza neuraminidase antigenic drift and virus fitness

5

6 Harrison Powell<sup>1</sup> and Andrew Pekosz<sup>1,\*</sup>

7 <sup>1</sup>W. Harry Feinstone Department of Molecular Microbiology and Immunology, Johns  
8 Hopkins Bloomberg School of Public Health, Baltimore, Maryland, United States of  
9 America

10

11 Corresponding author\*

12 Andrew Pekosz, Ph.D [apekosz1@jhu.edu](mailto:apekosz1@jhu.edu)

13

#### 14 **Author Contributions**

15 Harrison Powell

16 Roles: Conceptualization, Investigation, Methodology, Formal analysis, Validation,  
17 Visualization, Writing – Original Draft Preparation, and Writing – review & editing.

18

19 Andrew Pekosz

20 Roles: Conceptualization, Funding acquisition, Methodology, Project administration,  
21 Resources, Supervision, Visualization, Writing – review & editing

22

23

24

25

26 **Abstract**

27 In the 2014-2015 influenza season a novel neuraminidase (NA) genotype emerged in  
28 the Johns Hopkins Center of Excellence for Influenza Research and Surveillance (JH  
29 CEIRS) surveillance network as well as globally. This novel genotype encoded a  
30 glycosylation site at position 245-247 in the NA protein from clade 3c.2a H3N2 viruses.  
31 In the years following the 2014-2015 season, this novel NA glycosylation genotype  
32 quickly dominated the human H3N2 population of viruses. To assess the effect this  
33 novel glycosylation has on virus fitness and antibody binding, recombinant viruses with  
34 (NA Gly+) or without (NA Gly-) the novel NA glycosylation were created. Viruses with  
35 the 245 NA Gly+ genotype grew to a significantly lower infectious virus titer on primary,  
36 differentiated human nasal epithelial cells (hNEC) compared to viruses with the 245 NA  
37 Gly- genotype, but growth was similar on immortalized cells. The 245 NA Gly+ blocked  
38 human and rabbit monoclonal antibodies that target the enzymatic site from binding to  
39 their epitope. Additionally, viruses with the 245 NA Gly+ genotype had significantly  
40 lower enzymatic activity compared to viruses with the 245 NA Gly- genotype. Human  
41 monoclonal antibodies that target residues near the 245 NA glycosylation were less  
42 effective at inhibiting NA enzymatic activity and virus replication of viruses encoding an  
43 NA Gly+ protein compared to ones encoding NA Gly- protein. Additionally, a  
44 recombinant H6N2 virus with the 245 NA Gly+ protein was more resistant to enzymatic  
45 inhibition from convalescent serum from H3N2-infected humans compared to viruses  
46 with the 245 NA Gly- genotype. Finally, the 245 NA Gly+ protected from NA antibody

47 mediated virus neutralization. These results suggest that while the 245 NA Gly+  
48 decreases virus replication in hNECs and decreases enzymatic activity, the  
49 glycosylation blocks the binding of monoclonal and human serum NA specific antibodies  
50 that would otherwise inhibit enzymatic activity and virus replication.

51

52

53

54

55

56

57

58

59

60

61

62

63

64

65

66

67

68

69

70

71

72 **Author Summary**

73 Influenza virus infects millions of people worldwide and leads to thousands of deaths

74 and millions in economic loss each year. During the 2014/2015 season circulating

75 human H3N2 viruses acquired a novel mutation in the neuraminidase (NA) protein. This

76 mutation has since fixed in human H3N2 viruses. This mutation at position 245 through

77 247 in the amino acid sequence of NA encoded an N-linked glycosylation. Here, we

78 studied how this N-linked glycosylation impacts virus fitness and protein function. We

79 found that this N-linked glycosylation on the NA protein decreased viral replication

80 fitness on human nasal epithelial cells (hNEC) but not immortalized Madin-Darby

81 Canine Kidney (MDCK) cells. We also determined this glycosylation decreases NA

82 enzymatic activity, enzyme kinetics and affinity for substrate. Furthermore, we show that

83 this N-linked glycosylation at position 245 blocks some NA specific inhibitory antibodies

84 from binding to the protein, inhibiting enzymatic activity, and inhibiting viral replication.

85 Finally, we showed that viruses with the novel 245 N-linked glycosylation are more

86 resistant to convalescent human serum antibody mediated enzymatic inhibition. While

87 this 245 N-linked Glycan decreases viral replication and enzymatic activity, the 245 N-

88 linked glycosylation protects the virus from certain NA specific inhibitory antibodies. Our

89 study provides new insight into the function of this dominant H3N2 NA mutation and

90 how it impacts antigenicity and fitness of circulating H3N2 viruses.

91

## 92 **Introduction**

93           Each year seasonal influenza accounts for 3 to 5 million incidences of severe  
94 disease and up to 650,000 deaths [1]. Most influenza vaccines rely on the generation of  
95 antibodies against the hemagglutinin (HA) protein, one of the two major glycoproteins  
96 on the virion surface. The anti-HA protein antibodies inhibit virus entry into cells but also  
97 provide an immune pressure which leads to the emergence of virus strains with  
98 mutations in HA antigenic sites [2, 3]. This antigenic drift leads to escape from vaccine-  
99 and infection-induced immunity and results in the need to change influenza vaccine  
100 strains on a fairly frequent basis.

101           There is renewed interest in generating influenza vaccines that provide broader  
102 and stronger protection against several virus strains [4-6] and the other major influenza  
103 surface glycoprotein, the neuraminidase (NA) protein, has emerged as a potential  
104 candidate for such a universal influenza vaccine [6]. The NA protein has a  
105 neuraminidase activity that is critical in two stages of the virus life cycle[7-9]. The NA  
106 protein cleaves sialic acid from mucins that coat airway epithelial cells which reduces  
107 HA protein binding to mucins and facilitates entry into respiratory epithelial cells[10].  
108 The neuraminidase activity also removes sialic acid from host cell membrane bound  
109 proteins and viral HA and NA proteins at late times post infection, allowing viral particles  
110 to efficiently bud and spread to other respiratory epithelial cells[7, 11].

111           Anti-NA antibodies can prevent or decrease the severity of influenza infection[12-  
112 15]. High titer anti-NA antibodies have been correlated with decrease disease severity  
113 and protection in adults[16, 17]. Seasonal influenza A and B viruses have a conserved  
114 epitope in the NA protein which is necessary for enzymatic function[18, 19]. Antibodies

115 that target this epitope inhibit neuraminidase function and virus replication.  
116 Neuraminidase antibodies can be potent and broadly reactive [12, 20]. Anti-NA  
117 antibodies increase in titer with age and are capable of recognizing influenza strains  
118 isolated in many different influenza seasons [12, 19, 20]. Additionally, a subset of anti-  
119 NA antibodies raised in a human infection are broadly cross reactive and protective  
120 against influenza A and B virus strains [18, 19].

121       Neuraminidase antibodies can directly inhibit NA function as well as virus  
122 replication. Antibodies that bind neuraminidase can inhibit enzymatic activity,  
123 presumable through steric inhibition of substrate accessing the active site [12, 15].  
124 Blocking NA activity prevents the virus from properly budding, leading to virions which  
125 aggregate at the cell surface [9, 12, 21]. Furthermore, escape mutants that decrease  
126 binding of certain active site targeting anti-NA antibodies incur a significant fitness  
127 disadvantage in virus replication and enzymatic activity [19]. This is due to mutating  
128 residues critical for the enzymatic function which these broadly reactive antibodies  
129 target. These studies indicate the NA protein has a highly conserved and critical epitope  
130 which can be targeted by neutralizing antibodies. Targeting the NA protein has recently  
131 become one strategy for generating a universal influenza vaccine [15, 17, 20, 22]. As  
132 such, a polyclonal antibody response to the NA protein assures inhibition of NA function  
133 as well as steric hinderance of the HA protein - effectively neutralizing virus entry and  
134 release.

135       While the HA protein is the immunodominant antigen on the influenza virion,  
136 previous studies have shown the function and significance of anti-NA antibodies in  
137 vaccination and natural infection [12, 15, 20, 23, 24]. However, this immune pressure

138 can also lead to the selection of viruses that have accumulated mutations in NA protein  
139 antigenic sites. NA antigenic drift has been suggested to occur at lower frequency than  
140 HA antigenic drift but can have an impact on influenza spread and antibody recognition  
141 of NA [25-27].

142 In 2014-2015 a novel genotype emerged in the human H3N2 influenza viruses.  
143 This new genotype encoded an N-linked glycosylation at position 245-247 in the N2 NA  
144 protein. This glycosylation is located in close proximity to the NA active site and near a  
145 known antigenic site [28]. Using infectious clone technology to assess viral fitness and  
146 enzymatic activity, we demonstrate that this NA glycosylation prevents binding of  
147 inhibitory antibodies but also reduces NA enzymatic activity and virus fitness in human  
148 nasal epithelial cell cultures. The fitness cost of this mutation is therefore balanced by  
149 the advantage provided through the escape of preexisting immunity, contributing to  
150 viruses with this NA genotype becoming the dominant global H3N2 human virus strain.

## 151 **Results**

152 Currently, nearly all circulating human H3N2 viruses have a glycosylation  
153 sequence at positions 245-247 in the NA protein. To study the effect that 245 NA  
154 glycosylation has on virus replication and enzymatic activity, recombinant viruses were  
155 generated which encoded either the 2014/15 N2 NA proteins with (245 NA Gly+) or  
156 without (245 NA Gly-) the NA 245 glycosylation and a 2014/2015 HA protein. The  
157 remaining six influenza virus segments from A/Victoria/361/2011 (H3N2) were used as  
158 the virus genetic backbone. These viruses were first characterized on MDCK-SIAT1  
159 cells, which overexpress the human enzyme CMP-N-acetylneuraminate: $\beta$ -galactoside  
160  $\alpha$ -2,6-sialyltransferase producing more cell surface carbohydrates with terminal  $\alpha$ -2,6

161 sialic acid [29]. Both viruses showed similar kinetics of infectious virus production and  
162 peak infectious virus amounts after a low MOI infection (Fig 1A). In contrast, infection of  
163 hNEC cultures at a low MOI with the 245 NA Gly- virus yielded significantly higher  
164 amounts of infectious virus for a prolonged period of time when compared to the 245 NA  
165 Gly+ virus (Fig 1B). Plaque appearance, morphology and size was then assessed using  
166 MDCK cells. Both viruses produced clear, distinct plaques (Fig 1C) of similar size (Fig  
167 1D). This data indicates that while the 245 NA glycosylation does not impact virus  
168 replication on immortalized MDCK-SIAT1 or MDCK cells, it has an adverse effect on  
169 virus replication in hNEC cultures.

170       To understand how the addition of a N-linked glycosylation could impact virus  
171 replication and protein function, a model of the N2 neuraminidase monomer was  
172 generated with UCSF Chimera 3D modeling software. A similar N2 neuraminidase  
173 strain (A/Tanzania/2010) was used to highlight key residues and add a complex N-  
174 linked glycan at position 245 (Fig 2A) via the online program Glyprot. From the model, it  
175 is clear that the 245 N-linked Glycan is uniquely situated near the active site of the  
176 protein. To assess whether this N-linked glycan could interfere with the binding of  
177 antibodies that target epitopes close to the NA enzymatic active site, the coding  
178 sequences for both the 245 NA Gly+ and 245 NA Gly- gene were inserted into a  
179 mammalian cDNA expression vector (pCAGGS), with an N-terminal FLAG epitope tag  
180 before the stop codon (N-terminus). The NA-FLAG plasmids were transfected into  
181 HEK293T cells and the reactivity of the proteins assessed using monoclonal antibodies  
182 specific for the NA protein or the FLAG epitope. Three different anti-NA monoclonal  
183 antibodies were used. HCA-2 is a rabbit IgG that recognizes a highly conserved 9



184 amino acid sequence (ILRTQESEC) in the active site of most influenza A and B virus  
185 NA proteins. [18, 19]. This antibody was unable to bind to the 245 NA Gly+ protein but  
186 showed robust binding of the 245 NA Gly- protein (Fig 2B). The human monoclonal  
187 antibodies (235-1C02 and 229-1G02) were also used to study epitope masking. The  
188 binding of these antibodies to N2 NA proteins have been described previously [20]. NA  
189 proteins encoding amino acid changes at 248 and 429 [20] allow for escape from  
190 binding with 235-1C02, suggesting that glycosylation at 245 could inhibit antibody  
191 binding to its epitope. In fact, binding of the 235-1C02 to the 245 NA Gly+ protein was  
192 not detected but the antibody recognized the 245 NA Gly- protein (Figure 2C). The  
193 monoclonal antibody 229-1G03 was previously shown to robustly bind to 245 NA Gly-  
194 proteins, but its binding epitope has not been mapped. This antibody can inhibit NA  
195 enzymatic activity, suggesting it binds near the NA active site [20]. We found that this  
196 antibody recognizes both 245 NA Gly- and 245 NA Gly+ proteins but shows decreased  
197 binding to the 245 NA Gly+ protein, suggesting that the 245 NA glycan partially disrupts  
198 229-1G03 antibody epitope recognition (Figure 2D). Taken together these results  
199 indicate that the 245 NA glycan masks epitopes in and around the active site of the  
200 protein as well as multiple epitopes recognized by human monoclonal antibodies, some  
201 of which are potent, broadly reactive inhibitory antibodies. Similar results have recently  
202 been reported using the NA protein of the A/Hong Kong/4801/2014 vaccine strain [28].

203         To understand how 245 NA glycosylation impacted NA function a variety of  
204 enzymatic and kinetic activity assays were performed. To standardize NA content, we  
205 chose to partially purify virus particles using ultracentrifugation over a sucrose cushion  
206 then normalize for NA content using Western blotting with the HCA-2 monoclonal

207 antibody. While the HCA-2 antibody binding to conformationally intact 245 NA Gly+  
208 protein is inhibited, when the protein is denatured, the HCA-2 linear epitope is  
209 recognized in both the 245 NA Gly- and Gly+ proteins (Figure 3A) [18, 19]. The NA  
210 enzymatic activity was measured using three different NA assays. The Enzyme Linked  
211 Lectin Assay (ELLA) uses fetuin (Figure 3B) as a complex carbohydrate substrate which  
212 mimics the natural ligands seen by the NA protein during natural infection [30, 31]. The  
213 NA-STAR (Figure 3C) and NA-Fluor assays (Figure 3D) utilize smaller sialic acid  
214 mimics that release luminescent or fluorescent molecules after cleavage. Using all three  
215 substrates, the enzymatic activity of 245 NA Gly- was significantly higher than that of  
216 the 245 NA Gly+, suggesting that the 245 glycosylation was adversely affecting NA  
217 enzymatic activity. This NA activity difference was highest in the ELLA assay,  
218 suggesting that the 245 N-linked glycan sterically blocks the full carbohydrate substrate  
219 in this assay from the active site. However, the relatively smaller NA-STAR and NA  
220 Fluor substrates were still utilized less efficiently by the 245 NA Gly+ protein, suggesting  
221 this glycosylation may have more extensive structural effects on the NA active site.

222 In addition to bulk activity assays, we performed an enzyme kinetic assay to  
223 determine enzyme velocity and affinity for substrate (3E). As expected, the 245 NA Gly+  
224 protein has lower enzyme velocity and a lower affinity for substrate (Fig 3E, Table 1). All  
225 of these findings indicate that the 245 NA glycan significantly decreases NA enzymatic  
226 activity by decreasing substrate access to the active site of the protein.

227 Since the 245 NA glycosylation blocked or decreased binding of the two human  
228 monoclonal antibodies 235-1C02 and 229-1G03 and we tested the ability of these  
229 antibodies to inhibit viral enzymatic activity. First, viral stocks of 245 NA Gly+ and 245

230 NA Gly- were equalized via NA content and virus was incubated with a dilution series of  
231 the human monoclonal antibodies or oseltamivir. Vehicle (assay buffer) was used for a  
232 control and used to subtract background. As expected from the antibody binding  
233 studies, the monoclonal antibody 235-1C02 was unable to inhibit the NA enzymatic  
234 activity of the 245 NA Gly+ in the NA star assay even at the highest concentration  
235 tested (100nm) but inhibited the 245 NA Gly- virus at a concentration of 0.8nm (Figure  
236 4A). The 229-1G03 inhibited both the 245 NA Gly+ and 245 NA Gly- at a concentration  
237 of 4.7nm and 1.1nm respectively, suggesting a partial inhibition of inhibitory activity  
238 (Figure 4A) via the 245 NA glycan. The same trend is seen in the ELLA assay (4B) with  
239 235-1C02 unable to inhibit the neuraminidase activity of the 245 NA Gly+ virus and 229-  
240 G03 showing reduced inhibitory activity. Importantly, in both assays, oseltamivir  
241 inhibition was clearly observed and not different between viruses, suggesting that the  
242 drug was fully capable of inhibiting NA enzymatic activity irrespective of 245 NA  
243 glycosylation status. These results confirm that 245 NA glycosylation can result in  
244 reduced inhibitory activity of antibodies that bind near the NA active site. In addition to  
245 monoclonal antibody studies we investigated how human convalescent serum from the  
246 2014 through 2016 influenza seasons could inhibit enzymatic activity of the 245 NA  
247 Gly+ and 245 NA Gly- protein. We generated H6N2 viruses to avoid the confounding  
248 effect that anti-HA antibodies in human serum can have on NA enzymatic activity [30,  
249 32]. Twenty serum samples taken from individuals approximately 28 days after  
250 confirmed H3N2 infection were used. Ten serum samples were from patients infected  
251 with a 245 NA Gly- virus and 10 from patients infected with a 245 NA Gly+ virus (Table  
252 2). Regardless of the source of serum, the 245 NA Gly+ protein was more resistant to

253 serum based enzymatic inhibition, indicated by a higher concentration of serum needed  
254 to inhibit 50% of the enzymatic activity (Fig 4C-E, Table 2) when compared to the 245  
255 NA Gly- virus. In 18 of the 20 serum samples tested, two to three-fold more serum was  
256 necessary to inhibit the 245 NA Gly+ protein compared to the 245 NA Gly- protein (Fig  
257 4F). Together these results demonstrate that the 245 NA glycosylation sequence  
258 reduces the recognition of serum NA antibodies consistent with antigenic drift of the NA  
259 protein.

260           Neuraminidase inhibitory antibodies have previously been shown to inhibit virus  
261 replication by inhibiting enzymatic activity of the protein or by inducing a cellular immune  
262 response through antibody dependent cellular cytotoxicity (ADCC) [12, 20, 30, 33] or a  
263 combination of both. With two recombinant viruses only differing in the 245 NA  
264 glycosylation sequence, we sought to understand how this glycan would impact the  
265 ability of 229-1G03 and 235-1C02 to neutralize virus infectivity. Using the two  
266 recombinant viruses we found that the antibody 235-1C02 was unable to neutralize the  
267 245 NA Gly+ virus, but effectively neutralized the 245 NA Gly- virus at an average  
268 concentration of 1.3nm (Fig 5A). Using 229-1G03, we found this antibody was able to  
269 neutralize both 245 NA Gly+ and 245 NA Gly- viruses, with an average concentration of  
270 6.4nm and 1.5nm respectively, indicating somewhat reduced neutralizing activity  
271 against the 245 NA Gly+ virus (Fig 5B). Using the experimentally determined 50%  
272 neutralizing antibody concentration with the 245 NA Gly- virus in Fig5A and 5B, a  
273 multistep growth curve in the presence or absence of these antibodies was performed.  
274 Figure 5C demonstrates that the 245 NA Gly+ virus was not impacted with the 235-  
275 1C02 antibody, as no significant difference was found in infectious virus production

276 comparing human IgG isotype (clone IGHG1) and 235-1C02. However, antibody 229-  
277 1G03 did significantly decrease infectious virus production of the 245 NA Gly+ virus,  
278 showing a partial ability to neutralize infectious virus, consistent with the binding (Fig 2)  
279 and enzymatic inhibition results (Fig 4). This suggests that the epitope this antibody  
280 binds is partially accessible on the 245 NA Gly+ protein. In Figure 5D, both human  
281 monoclonal antibodies significantly decreased infectious virus production of the 245 NA  
282 Gly- virus to near undetectable levels, suggesting potent neutralizing activity. These  
283 results confirm our previous findings with protein binding (Fig 2) and enzymatic  
284 inhibition (Fig 3). The 245 NA glycan prevents NA active site-specific antibodies from  
285 binding and inhibiting the NA protein, and significantly decreases antibody mediated  
286 neutralization of other NA specific neutralizing antibodies.

## 287 **Discussion**

288 In this study we demonstrated that the recently acquired 245 N-linked glycosylation site  
289 in the NA protein of currently circulating human H3N2 viruses significantly alters the  
290 function and antigenicity of the NA protein. The 245 NA glycan decreased in vitro  
291 replication on primary hNECs but did not decrease replication on immortalized MDCK  
292 cells nor decrease plaque area of isogenic viruses (Fig 1). This suggests that some  
293 aspect of primary hNECs, likely the presence of respiratory mucins, is decreasing virus  
294 replication. Neuraminidase is necessary for virus motility through mucins [10, 34] and  
295 decreasing NA enzymatic activity likely decreases the ability of the virus to move  
296 through mucus. The decrease in neuraminidase activity found in three separate activity  
297 assays (Fig 3) but was most pronounced when fetuin was used as a substrate,  
298 indicating recognition of sialic acid on longer carbohydrate chains is especially affected

299 by 245 NA glycosylation. We conclude that the 245 NA glycan likely blocks substrate  
300 access to the active site and decreases enzymatic activity. Decreasing enzymatic  
301 activity is likely tied to a decrease in replication seen in mucin secreting hNECs but not  
302 seen in immortalized MDCK cells, which to this point have not been shown to secrete  
303 mucins.

304 The presence of a glycosylation site at NA 245 did not affect NA sensitivity to the  
305 antiviral drug oseltamivir. While oseltamivir access to the NA active site may be reduced  
306 due to the 245 NA glycosylation in a manner similar to that seen with the other enzyme  
307 substrates used, subsequent release of oseltamivir is most likely not effected, resulting  
308 in efficient inhibition of NA enzymatic activity. Further studies of the kinetics of  
309 oseltamivir inhibition of 245 NA Gly+ and 245 NA Gly- viruses could provide additional  
310 insights into this observation.

311 Recently there have been attempts to map the antigenic regions of the NA  
312 protein. The 245 NA glycan is located near the enzymatic active site ([28], Fig 2) and is  
313 poised to mask this region of the NA protein. We sought to understand how this  
314 glycosylation, which incurs a significant fitness disadvantage as judged by virus  
315 replication in hNEC cultures, could still fix in the human H3N2 virus population in such a  
316 short timeframe. Through multiple assays we found this glycan has an important role in  
317 masking NA antigenic sites. This glycan blocks NA active site-specific antibodies from  
318 binding (Fig 2), prevents NA active site-specific antibodies from inhibiting enzyme  
319 function (fig 4), and blocks the ability of active site antibodies to neutralizing virus  
320 replication (fig 5). Additionally, another NA specific monoclonal (229-1G03) antibody  
321 with an as yet undefined binding epitope is partially blocked from binding to their epitope

322 by this glycan (Fig 2, 4, 5), suggesting that the 245 NA glycan masks multiple epitopes  
323 on the NA protein. This inhibition of NA inhibitory antibody activity was shown with  
324 specific monoclonal antibodies and with polyclonal serum from H3N2 infected  
325 individuals. The ability to escape from preexisting NA immunity therefore provides a  
326 significant fitness advantage for the virus. While we used serum antibody levels to show  
327 reduced activity towards 245 NA Gly+ viruses, assessing escape from NA antibody in  
328 respiratory tract secretions would be more relevant. This antibody evasion presumably  
329 counters the reduced replication of 245 NA Gly+ viruses in hNEC cultures, resulting in a  
330 virus whose overall fitness for infecting humans is increased compared to 245 NA Gly-  
331 viruses. Since the virus replication fitness deficits were only observed in hNEC cultures  
332 while the antibody inhibition of virus replication was evident in immortalized cell lines,  
333 our use of hNEC cultures has allowed for a more complete understanding of the effects  
334 of 245 NA glycosylation on virus fitness.

335       Neuraminidase works in conjunction with the HA receptor of the influenza virus to  
336 infect and spread virus effectively [35, 36]. As such, studying the NA and HA proteins  
337 together is crucial to understanding viral evolution. Both the HA and the NA protein  
338 interact with the same ligand, sialic acid, and thus balancing each proteins' affinity for  
339 this ligand is critical to the influenza cycle [35-38]. Both proteins are necessary for in  
340 vivo replication, but the nuance of their interaction is important as well. Too strong of an  
341 HA-sialic acid interaction compared to NA activity results in the HA protein being  
342 trapped in respiratory mucins or not being able to release progeny virions from the  
343 infected cell [39, 40]. On the other side of the spectrum, too weak of an HA-sialic acid  
344 interaction compared to NA activity results in removal of sialic acid receptors before the

345 HA protein can engage its ligand and initiate infection. This fine balance between affinity  
346 for sialic acid impacts virus fitness [36, 37]. Whether the adverse effects of 245 NA Gly+  
347 are observed with more recent H3 HA proteins should be investigated to determine  
348 whether HA mutations that compensate for the reduced 245 NA Gly+ enzymatic activity  
349 have fixed in human H3N2 viruses.

350 In recent years the NA protein has had renewed interest as a relatively  
351 conserved protein that's an attractive vaccine target[12, 22, 41]. In some respects, the  
352 NA protein is an excellent candidate for a universal vaccine. A single monoclonal  
353 antibody can neutralize decades of influenza virus isolates regardless of strain at  
354 nanomolar amounts. Neuraminidase inhibitory antibodies can inhibit viral spread, and  
355 replication at multiple stages of the virus life cycle [42]. Finally, many different studies  
356 show that NA inhibitory antibodies can decrease disease severity, virus transmission or  
357 provide sterilizing immunity [5, 14, 18-20, 24].

358 Antibody response to NA are not induced effectively in all age groups by current  
359 influenza vaccines because the amount of NA is not standardized in vaccine  
360 preparations and the NA protein conformation is more sensitive to the current vaccine  
361 production methods than the HA protein[12, 20, 43, 44]. While other methods for  
362 inducing NA immunity are being developed, our data show that two amino acid changes  
363 in N2 NA can lead to escape from antibodies that bind to one of the most universal  
364 antigenic sites of the protein. It is important that future studies of universal influenza  
365 vaccines utilize a multi-epitope vaccine that would require multiple mutations from the  
366 virus to escape the vaccine-induced immunity.



367           This study highlights the necessity to consider multiple aspects of the NA protein  
368   in regard to vaccine production and virus evolution. Decades of influenza research have  
369   focused on the HA protein for vaccine development, viral evolution and pandemic  
370   potential. As the interest in NA protein as a vaccine increases, many of the lessons  
371   learned studying influenza HA may also be applied to NA. The NA protein is  
372   immunogenic and can provide protection against many strains of influenza viruses[41].  
373   However, like the HA protein, the NA protein can undergo antigenic drift and evade the  
374   humoral immune response. As immune pressure mounts due to a renewed vaccination  
375   effort at targeting NA protein, the NA protein will likely also become a “moving target” for  
376   vaccine development, in a manner similar to what has already been documented for the  
377   HA proteins.

378

379

380

381

382

383

384

385

386

387

388

389

390  
391  
392  
393

## Tables

| <b>Test Virus</b> | <b>vMAX (95% CI)</b>     | <b>Km (95% CI)</b>     | <b>R squared of line</b> |
|-------------------|--------------------------|------------------------|--------------------------|
| 245 NA Gly-       | .6645 (0.6305 to 0.7001) | 61.55 (50.59 to 74.76) | .9942                    |
| 245 NA Gly+       | .4680 (0.4551 to 0.4813) | 108.9 (99.12 to 119.6) | .9988                    |

394  
395  
396  
397  
398  
399  
400  
401  
402  
403  
404  
405  
406  
407  
408  
409  
410  
411  
412  
413  
414  
415  
416  
417  
418  
419  
420  
421  
422  
423  
424  
425  
426  
427  
428  
429  
430

Table 1: Enzyme kinetics of 245 NA Gly- and 245 NA Gly+ viruses. NA-Flour assay conducted in triplicate, representative of two biological replicates. Values calculated with Graph Pad prism 8 with Michaelis-Menten non-linear regression. 95% confidence interval (CI) shown.

| <b>Convalescent Serum ID</b> | <b>Serum NA Genotype</b> | <b>245 NA Gly+ NAI<sub>50</sub> Titer</b> | <b>245 NA Gly- NAI<sub>50</sub> Titer</b> | <b>Fold NA Gly+ / NA Gly-</b> |
|------------------------------|--------------------------|-------------------------------------------|-------------------------------------------|-------------------------------|
| 01-23-A-0081                 | NA Gly Positive          | 80                                        | 80                                        | 1                             |
| 01-23-A-0023                 | NA Gly Positive          | 160                                       | 640                                       | 4                             |
| 01-23-A-0051                 | NA Gly Positive          | 160                                       | 320                                       | 2                             |
| 01-11-A-0262                 | NA Gly Positive          | 1280                                      | 2560                                      | 2                             |
| 01-21-A-0268                 | NA Gly Positive          | 1280                                      | 2560                                      | 2                             |
| 02-11-Pro-0003               | NA Gly Positive          | 80                                        | 80                                        | 1                             |
| 02-11-Pro-0005               | NA Gly Positive          | 160                                       | 320                                       | 2                             |
| 02-11-Pro-0023               | NA Gly Positive          | 320                                       | 1280                                      | 4                             |
| 02-11-Pro-0029               | NA Gly Positive          | <40                                       | 320                                       | 8                             |
| 02-11-Pro-0101               | NA Gly Positive          | 160                                       | 2560                                      | 8                             |
| 01-11-A-0148                 | NA Gly Negative          | 40                                        | 80                                        | 2                             |
| 01-11-A-0256                 | NA Gly Negative          | 1280                                      | 5120                                      | 4                             |
| 01-11-A-0307                 | NA Gly Negative          | 640                                       | 1280                                      | 2                             |
| 02-11-Pro-0006               | NA Gly Negative          | 1280                                      | 1280                                      | 1                             |
| 01-21-A-0192                 | NA Gly Negative          | 320                                       | 640                                       | 2                             |
| 02-11-Pro-0030               | NA Gly Negative          | <40                                       | <40                                       | 1                             |
| 02-11-Pro-0036               | NA Gly Negative          | <40                                       | 160                                       | 4                             |
| 02-11-Pro-0056               | NA Gly Negative          | 160                                       | 320                                       | 2                             |
| 02-11-Pro-0057               | NA Gly Negative          | 160                                       | 320                                       | 2                             |
| 01-21-A-0185                 | NA Gly Negative          | 160                                       | 320                                       | 2                             |

431  
432  
433  
434  
435  
436  
437  
438  
439  
440  
441  
442  
443  
444  
445  
446  
447

Table 2: Serum samples and 50% NAI values. Serum samples taken from CEIRS study. Serum genotype, 50% NAI (NAI<sub>50</sub>) titer and fold difference shown. Twenty convalescent serum samples taken approximately 28 days after confirmed H3N2 infection used. Ten from 245 NA Gly+ infected patients, 10 from individuals infected with a 245 NA Gly- virus. NAI<sub>50</sub> values are the highest titer that resulted in at least 50% inhibition of enzyme activity in ELLA assay using H6N2 viruses expressing either 245 NA Gly+ or 245 NA Gly- protein. Data shown from one biological replicate. Each NAI assay was conducted in duplicate and averaged to determine titer.

448

## 449 **Materials and Methods**

### 450 **Cell Lines and Primary Cells**

451 Madin-Darby Canine Kidney Cells (MDCK) and human embryonic kidney cells

452 293T (HEK293T) were maintained in complete medium (CM) consisting of Dulbecco's

453 Modified Eagle Medium (DMEM) supplemented with 10% fetal bovine serum, 100U/ml

454 penicillin/streptomycin (Life Technologies) and 2mM Glutamax (Gibco). Human nasal

455 epithelial cells (hNEC) were isolated from non-diseased donor tissue following

456 endoscopic sinus surgery. Cells were grown, differentiated and maintained at the air

457 liquid interface as previously described [45]. hNEC differentiation medium and

458 maintenance medium was prepared as previously described [45-47]. hNEC cultures

459 were used for low MOI growth curves only when fully differentiated. All cells were

460 maintained at 37°C in a humidified incubator supplemented with 5% CO<sub>2</sub>.

### 461 **Plasmids**

462 The plasmid pHH21 was used to generate full length influenza hemagglutinin

463 (HA) or neuraminidase (NA) plasmids for recombinant virus production. Briefly, viral

464 RNA was isolated from the clade 3c.2a H3N2 viruses A/Bethesda/P0055/2015 (NA Gly+

465 ID 253812) and A/Columbia/P0041/2014 (NA Gly- ID 253817) with a Qiagen mini-vRNA

466 isolation kit. Gene specific primers with cloning sites for H3N2 neuraminidase or

467 hemagglutinin were used to create cDNA via a one-step RT-PCR reaction (SuperScript

468 III-Platinum Taq mix, ThermoFisher Scientific). The cDNA products were cut with

469 appropriate restriction enzymes, column purified (QIAquick PCR Purification kit) and

470 ligated with restriction enzyme cut-pHH21 using T4-ligase (New England Biolabs, NEB).

471 Ligation products were transformed into DH5a (NEB) cells and colonies were mini-

472 prepped (QIAprep spin mini-prep) and Sanger sequence verified. Sequence verified

473 colonies were maxi-prepped (ZymoPURE) and used for recombinant virus preparation.  
474 Since the HA amino acid sequence between A/Bethesda/55/2015 is identical to  
475 A/Columbia/41/2014, A/Bethesda/55/2015 HA-pHH21 plasmid was used for both H3N2  
476 viruses. The codon at amino acid position 160 in HA (H3 numbering, Threonine) was  
477 modified via site-directed mutagenesis (Agilent) from the wild type (ACA, Thr) to a new  
478 codon (ACT, Thr) less likely to revert to a lysine codon- which occurred frequently  
479 during previous attempts to virus rescue.

480 H6 hemagglutinin-pHH21 was synthesized by Genscript ([www.genscript.com](http://www.genscript.com)) in  
481 the pHH21 vector. The H6 HA coding sequence from A/Environment/Hubei-  
482 Jinzhou/02/2010 [48] was inserted into pHH21 flanked by human H3 5'  
483 (GCAAAAGCAGGGGATAATTCTATTAACC) and 3'  
484 (TAAGAGTGCATTAATTAAAAACACCCTTGTTTCTACTAA) UTR sequences. After  
485 gene synthesis, two mutations (Q223L and G225S) were added in the HA coding  
486 sequence to increase HA protein binding to 2,6 sialic acid [49]. The gene product was  
487 transformed into DH5a (NEB) and maxi-prepped for recombinant virus production.  
488 pHH21 plasmids encoding the internal segments for A/Victoria/361/2011 (H3N2, rVic  
489 recombinant viruses) or A/WSN/33 (H6N2, rWSN recombinant viruses) were generated  
490 as previous described [50].

491 The plasmid pCAGGS was used for transient expression of C-terminal flag-  
492 tagged NA Gly+ or NA Gly- neuraminidase proteins. C-terminal flag tag (DYKDDDDK)  
493 was added to pHH21-NA encoding plasmids via site directed mutagenesis (Agilent).  
494 cDNA was generated from the pHH21-NA flag plasmids with Q5 Hot-Start PCR (NEB).

495 This cDNA product was then cloned into the mammalian expression vector pCAGGS for  
496 transient transfection experiments as previously described [51].

### 497 **Recombinant Virus Production**

498 Recombinant H3N2 or H6N2 viruses were generated using the 12-plasmids  
499 reverse genetics system as previously described [50]. Briefly HEK293T cells were  
500 plated at 50% confluency 1 day before transfection in complete media. On the day of  
501 transfection, media was replaced with serum free Opti-MEM. HEK293Ts were then  
502 transfected with eight plasmids encoding full length influenza segments in the pHH21  
503 vector (PB2, PB1, PA, HA, NP, NA, M, NS) and four plasmids encoding the influenza  
504 replication proteins in the pcDNA3.1 vector (PB2, PB1, PA and NP). At one day post  
505 transfection 5ug/ml N-acetyl trypsin was added to the transfection reaction. MDCK cells  
506 were over-laid four hours post trypsin treatment. Every 24 hours post MDCK-overlay  
507 virus containing supernatant was sampled for virus production. Fresh Opti-MEM with  
508 5ug/ml N-acetyl trypsin was added when a sample was taken. Virus from the  
509 transfected cell supernatants was plaque purified as described below, sequenced, and  
510 used to generate seed stocks by infecting MDCK cells at an MOI of 0.001. Working  
511 stocks were generated from sequence confirmed seed stocks by infecting MDCK cells  
512 at an MOI of .001 as described below.

### 513 **Plaque Assay**

514 MDCK cells were grown in complete medium to 100% confluency in 6-well  
515 plates. Complete medium was removed, cells were washed twice with PBS containing  
516 2mm calcium magnesium (PBS+) and 400uL of inoculum was added. Cells were  
517 incubated at 32°C for 1hour with rocking every 15 minutes. After 1hr, the virus inoculum

518 was removed and phenol-red free DMEM supplemented with 3% BSA (Sigma), 100U/ml  
519 pen/strep (Life Technologies), 2mM Glutamax (Gibco), 5mM HEPES buffer (Gibco)  
520 5ug/ml N-acetyl trypsin (Sigma) and 1% agarose was added. Cells were incubated at  
521 32°C for 3-5 days and then fixed with 4% formaldehyde. After removing the agarose,  
522 cells were stained with naphthol-blue black. Plaque size was analyzed in ImageJ [52].  
523 For recombinant virus production, virus plaques were picked with a pipette instead of  
524 fixing with formaldehyde and placed in IM and stored at -80°C for later seed stock  
525 generation.

### 526 **Virus seed and working stocks**

527 For generation of recombinant virus seed stocks, 400ul of plaque picked virus  
528 was added to confluent MDCK cells plated in 6 well plates and infected for 1hr as  
529 previously described [49, 51]. The plaque pick inoculum was removed and infection  
530 media (IM) was added. Infection medium (IM), consisted of DMEM with .3% BSA  
531 (Sigma), 100U/ml pen/strep (Life Technologies), 2mM Glutamax (Gibco) and 5ug/ml N-  
532 acetyl trypsin((Sigma)). Cells were placed in a 32°C incubator and monitored daily for  
533 CPE. Seed stock was harvested between 3 and 5 days or when CPE reached  
534 approximately 75-80%. Seed stocks were then sequenced and infectious virus titer  
535 determined by TCID50. A working stock for each virus was generated by infecting  
536 confluent MDCK cells in a T75 flask at an MOI of .001 for 1 hour at 32°C. The inoculum  
537 was removed, and IM was added. Cells were monitored daily for CPE and working  
538 stock harvested when CPE reached approximately 75-80%. Working stocks were  
539 sequenced verified and infectious virus determined via TCID50 as described below.

### 540 **Low-MOI Infections**

541 Low-MOI growth curves were performed at an MOI of .001 in MDCK cells and  
542 .01 in hNEC cultures. MDCK cell infections were performed as described above. After  
543 the infection, the inoculum was removed and the MDCK cells were washed three times  
544 with PBS+. After washing, IM was added and the cells were placed at 32°C. At the  
545 indicated times post inoculation, IM was removed from the MDCK cells and frozen at -  
546 80°C. Fresh IM was then added. For low-MOI growth curves in the presence of  
547 monoclonal antibodies, the indicated antibodies were added to the IM after the virus  
548 was allowed to attach to cells. In low-MOI hNEC growth curves, the apical surface was  
549 washed three times with PBS and the basolateral media was changed at time of  
550 infection. hNEC cultures were inoculated at an MOI of .01. hNEC cultures were then  
551 placed in a 32°C incubator for 2 hours. After inoculation, the hNECs were washed three  
552 times with PBS. At the indicated times, 100ul of IM without N-acetyl trypsin was added  
553 to the apical surface of the hNECs. The hNECs were then incubated for 5 minutes at  
554 32°C and the IM was harvested and frozen at -80°C. Basolateral media was changed  
555 every 48hrs post infection for the duration of the experiment.

#### 556 **TCID50**

557 MDCK cells were seeded in a 96 well plate 2 days before assay and grown to  
558 100% confluence. Cells were washed twice with PBS+ then 180uL of IM was added to  
559 each well. Ten-fold serial dilutions of virus was created and then 20uL of the virus  
560 dilution was added to the MDCK cells. Cells were incubated for 6 days at 32°C then  
561 fixed with 2% formaldehyde. After fixing, cells were stained with naphthol blue-black,  
562 washed and virus titer was calculated[49, 51].

#### 563 **Transient Transfection for NA-Flag expressing cells**



564 Transient transfection of HEK293T was performed with TransIT-LT1 per the  
565 manufacturers protocol. Briefly, cells were grown in complete medium until time of  
566 transfection to roughly 50% confluency. On the day of transfection, complete medium  
567 was removed and replaced with Opti-MEM serum free medium. Opti-MEM, TransIT-LT1  
568 and 2.5ug of plasmids encoding gene of interest were mixed then added to HEK293T  
569 cells. At 16hr post transfection wells were used for flow cytometric analysis.

### 570 **NA Antibodies**

571 NA specific monoclonal antibodies 229-1G03, 235-1C02 and HCA2 were used to  
572 assess binding to NA proteins. 229-1G03 and 235-1C02 were provided by Patrick  
573 Wilson [20]. 235-1C02 binds to residues 249 and 428 on the NA protein as described  
574 and the 229-1G03 binds to an as yet uncharacterized epitope on the N2 NA protein.  
575 HCA-2 monoclonal antibody was provided by Sean Li [18]. HCA-2 binds to a known,  
576 highly conserved epitope in the active site of the NA protein, residues 222-230  
577 ILRTQESEC. To assess antibody binding to expressed NA proteins, all monoclonal  
578 antibodies were diluted to 1ug/ml 1X PBS (Quality Biologics) containing .1% BSA,  
579 (Sigma) was used throughout antibody staining protocol (FACS buffer). The antibodies  
580 were then serially diluted 1:2 in FACS buffer. Mouse anti-FLAG (clone M2, Sigma) was  
581 diluted in FACS buffer to 1ug/ml. For western blotting mouse anti-FLAG and anti-  
582 influenza M1 antibody were diluted to 2ug/ml in blocking buffer. Antibodies were diluted  
583 in IM for virus neutralization assays. For low MOI growth curve viral inhibition, NA  
584 inhibitory antibodies were diluted in IM + 5ug N-Acetyl Trypsin. 229-1G03 was diluted to  
585 1.5nm, 235-1C02 1.3nm, and human IgG isotype clone IGHG1 diluted to 5nM.

### 586 **Secondary Antibodies**

587 Secondary antibodies were used to detect binding of primary unconjugated monoclonal  
588 antibodies. Goat anti-Mouse IgG Alexa Fluor 488, Goat anti-Rabbit IgG Alexa Fluor 647  
589 and Goat anti-Human IgG Alexa Fluor 647 were used at 1ug/ml concentration in FACS  
590 buffer (ThermoFisher Scientific). For western blotting, all secondary antibodies were  
591 diluted in blocking buffer at a concentration of 1ug/ml.

## 592 **Human Serum and Ethics statement**

593

594 Convalescent human serum obtained through the JH-CEIRS study  
595 (HHSN272201400007C) were used in this study. Serum samples were treated with  
596 receptor destroying enzyme (Cosmos Biological) and heat treated according to the  
597 manufacturer's protocol for use in ELLA studies. The Institutional Review Board at the  
598 Johns Hopkins University School of Medicine provided ethical approval of the study  
599 (IRB00052743). Patients were approached by trained clinical coordinators who obtained  
600 written, informed consent before collecting specimens, demographic and clinical data  
601 using a standard questionnaire. Data was confirmed by examination of the patient's  
602 electronic health record. All data was de-identified.

603

## 604 **Flow Cytometry**

605 HEK293T cells were detached with .05% Trypsin-EDTA (Life Technologies) and  
606 fixed with 2% paraformaldehyde (Affymetrix) at room temperature for 15 minutes. Cells  
607 were washed with FACS buffer after fixation and stained with the indicated amounts of  
608 human or rabbit monoclonal antibody and anti-FLAG mouse monoclonal antibody. Cells  
609 were washed twice in FACS butter between each antibody incubation step. Cells were

610 analyzed on a BD-FACS Calibur and data analyzed with FlowJo V10.5.3 software.

611 Geometric mean was used to identify mean fluorescence intensity (MFI).

### 612 **Partially Purifying Virus Particles**

613 Virus partially purified by ultracentrifugation over a sucrose cushion for SDS-  
614 PAGE and western blotting. Clarified virus working stock supernatant was overlaid onto  
615 a 25% sucrose-NTE (100nM NaCl (ThermoFisher Scientific), 10mM Tris (Promega) and  
616 1mM EDTA (Sigma)) buffer. Virus was centrifuged at 27,000 RPM in a SW-28 rotor in a  
617 Beckman Coulter Optima L90-K UltraCentrifuge for 2 hours. After the first  
618 ultracentrifugation, the supernatant was removed. The virus pellet was re-suspended in  
619 PBS. Pellet was further concentrated by ultracentrifugation in an SW-28ti rotor at 23,000  
620 RPM for 1hr. The pellet was resuspended in PBS for use in NA activity, western blotting  
621 and PNGase assays.

### 622 **PNGase, SDS-PAGE and Western Blotting**

623 Partially purified virus particles were used for SDS-PAGE. For PNGase treatment, the  
624 PNGase kit from (NEB) was used per manufacturer's instructions. After PNGase  
625 treatment, all samples were treated with 4X-Laemli buffer (Bio-Rad) containing 250mM  
626 dithiothreitol (DTT, ThermoFisher Scientific) and boiled at 100°C for 5 minutes. Samples  
627 were run on 4-20% Mini-PROTEAN TGX gels (Bio-Rad) with an All-Blue precision plus  
628 protein ladder (Bio-Rad) at 70v. Proteins were transferred onto an immobilon-FL  
629 membrane (Millipore) at 75v for 1hr. After transfer, membranes were blocked with  
630 blocking buffer (PBS containing .05% Tween-20 (Sigma) and 5% non-fat milk (Bio-  
631 Rad)) for 1 hour at room temp. Primary antibody (HCA2 and anti-M1) was incubated  
632 overnight at 4°C in blocking buffer. Membranes were washed in PBS with .05% Tween-

633 20 (wash buffer). Secondary antibody was added for 1hr at room temperature (25°C) in  
634 blocking buffer then washed again in wash buffer. Blots were imaged and analyzed with  
635 the FluorChem Q system (Proteinsimple).

### 636 **NA-Star Assay**

637 NA-Star Influenza Neuraminidase Inhibitor Resistance Detection Kit  
638 assay was performed according to manufactures specifications (ThermoFisher  
639 Scientific). Briefly, serial two fold dilutions of human serum or monoclonal antibodies  
640 were mixed in NA-STAR assay buffer. An equal volume of partially purified virus diluted  
641 in NA-Star assay buffer was added to the antibody dilutions. This mixture of virus and  
642 antibody was placed in a 96 well white opaque plate and incubated at room temp for 30  
643 minutes with gently horizontal shaking. After incubation, 10ul of 1X NA-*Star* substrate  
644 was added and the plates were incubated at room temp for an additional 30 minutes  
645 while shaking. After adding substrate, accelerator was added and plates were read  
646 immediately by measuring luminescence on a FilterMax F5 multimode microplate  
647 reader. To assess overall NA activity, no monoclonal antibody was added. Data was  
648 analyzed in Prism (GraphPad) and 50% inhibition was defined as antibody or serum  
649 concentration that resulted in at least 50% inhibition of NA activity compared to virus  
650 without antibody.

### 651 **Enzyme Linked Lectin Assay**

652 Enzyme linked lectin assays (ELLA) were performed as previously [30, 31]. Flat-  
653 Bottom Nunc MaxiSorp plates (ThermoFisher Scientific) were coated with 100ul of  
654 fetuin (Sigma) at 25ug/ml. Plates were kept at 4°C for at least 18 hours, up to 1 month  
655 before use. Monoclonal antibodies, human serum or oseltamivir were serially two-fold

656 diluted in Dulbecco's phosphate buffered saline with calcium and magnesium  
657 (ThermoFisher Scientific) containing 1% BSA (Sigma) and .2% Tween-20 (referred to  
658 as sample buffer). Dilutions were performed in 60ul in duplicate on a Nunclon Delta  
659 Surface Round bottom 96 well plate. Virus was added to sample buffer, and 60ul of  
660 virus was added to the dilution plate. For monoclonal antibody and inhibitor experiments  
661 recombinant H3N2 virus was used. For human serum, recombinant H6N2 virus was  
662 used. NA content was equalized via western blotting for H3N2 or virus content  
663 equalized via plaque assay for H6N2. Fetuin coated plates were washed immediately  
664 before addition of 100ul virus premixed with antibody, serum or oseltamivir. Plates were  
665 covered with a plastic lid then placed in 37°C incubator with 5% CO<sub>2</sub> for 16-18 hours  
666 overnight. The following day, plates were washed six times with PBS containing .05%  
667 Tween 20 (referred to as PBST). After the last wash, 100ul of biotinylated peanut  
668 agglutinin lectin at 1ug/ml was added to every well and incubated at room temperature  
669 for 2 hours. After peanut lectin addition, plates were washed three times with PBST.  
670 Next, 100ul of 1ug/ml streptavidin-horse radish peroxidase (Millipore Sigma) was added  
671 to every well and plates were incubated at room temperature for 1 hour. Plates were  
672 then washed 3 times with PBST before the addition of 100ul of .5mg/ml o-  
673 Phenylenediamine (Sigma) diluted in phosphate-citrate buffer with sodium perborate  
674 (Sigma). Plates were incubated for 10 minutes at room temperature and reactions were  
675 stopped and developed by addition of 100ul of 2N sulfuric acid diluted in water.  
676 Absorbance was read at 405nm on a FilterMax F5 multimode microplate reader  
677 (Molecular Devices). To assess NA activity, no monoclonal antibody was added. Data  
678 was analyzed in Prism (GraphPad8) and 50% inhibition was defined as antibody or

679 serum concentration that resulted in at least 50% inhibition of NA activity compared to  
680 virus without antibody.

### 681 **NA-Fluor Assay**

682 NA-Fluor Influenza Neuraminidase Assay was performed according to  
683 manufacturer's specifications and enzyme kinetics experiments performed as previously  
684 reported [53]. For enzyme kinetics, MUNANA substrate was serially two-fold diluted in  
685 assay buffer on an opaque black 96 well plate. Virus was prepared in assay buffer then  
686 added to the plate containing MUNANA substrate dilutions. Fluorescence was  
687 measured every 60s for 1 hour after addition of virus on a FilterMax F5 multimode  
688 microplate reader (Molecular Devices). Enzyme Vmax and Km was calculated using  
689 Prism software (GraphPad).

### 690 **NA Neutralizing Antibody Assay**

691 To assess the ability of monoclonal antibodies ability to inhibit virus replication, a  
692 neutralizing assay was performed. MDCK cells were plated to 100% confluency on 96  
693 well plates and washed twice with PBS+. A two-fold serial dilution of monoclonal  
694 antibody was made in IM + 5ug/ml N-acetyl trypsin at a starting concentration of 100nm  
695 in a volume of 60ul in duplicate on round bottom Nunclon plates. Next, 60ul (total of  
696 2,000 PFU) of either 245 NA Gly+ or 245 NA Gly- H3N2 recombinant virus diluted in IM  
697 with 5ug/ml N-Acetyl Trypsin was added to the dilution plate and 100ul of the mixture of  
698 virus and antibody was then added to MDCK plates. After 6 days plates were fixed with  
699 4% formaldehyde and stained with naphthol blue-black as described above. Wells were  
700 considered negative for virus replication if the entire monolayer was intact.

### 701 **NA Neutralizing Antibody Virus Replication Assay**

702 To study monoclonal antibody inhibition of multistep viral growth, viral replication  
703 assays were conducted in the presence of NA monoclonal antibodies or human IgG  
704 isotype. Confluent MDCKs were infected with an MOI of .001 as described above. After  
705 infection, viral inoculum was removed, the cells washed twice with PBS+ and  
706 monoclonal antibodies (235-1C02, 229-1G03 or human IgG isotype clone IGHG1) were  
707 added at the indicated concentration in IM containing 5ug/ml n-Acetyl trypsin. Infected  
708 cells were incubated at 32°C. At each timepoint post infection, supernatant was  
709 removed and stored at -80C. Fresh IM with 5ug/ml N-acetyl trypsin and the indicated  
710 antibody was added. Viral titer was determined via TCID<sub>50</sub>.

711

712

713

## 714 **Acknowledgements**

715 We thank the members of the Pekosz laboratory, the Klein laboratory, and the Davis  
716 Lab for data discussion and feedback. We would also like to thank The Johns Hopkins  
717 Department of Emergency Medicine, the Johns Hopkins Department of Infectious  
718 Diseases, the Johns Hopkins Applied Physics Lab, Dr. Andrew Lane, Dr. Xuguang  
719 (Sean) Li, and Patrick Wilson for providing reagents and cells. The work was supported  
720 by CEIRS HHSN272201400007C and T32 AI007417 (HP).

721

722 **Figure legends**

723 **Figure 1:** Replication of recombinant H3N2 viruses in MDCK-SIAT1, MDCK or hNEC  
724 cultures with or without 245 NA glycosylation. Low MOI growth curves with MDCK-  
725 SIAT1 (**A**) or hNEC cultures (**B**) with the indicated recombinant viruses at 32°C. Hours  
726 post infection (HPI) on X axis, Log of TCID<sub>50</sub>/ml on Y axis. Data are pooled from 3  
727 independent experiments with four replicates per virus per experiment (total n = 12 wells  
728 per virus timepoint). Data were analyzed with \*p<.05 and two-way repeated measures  
729 ANOVA with Bonferroni multiple comparison posttest. The limit of detection (L.O.D.) is  
730 indicated with a dotted line at log 2.37 TCID<sub>50</sub>/ml. Error bars in A and B are SEM. (**C**)  
731 Plaque assay performed with recombinant 245 NA Gly + and 245 NA Gly - viruses on  
732 MDCK cells. (**D**) Quantification of plaque area from 30-50 individual plaques per virus  
733 from 3 independent experiments. \*p<.05 unpaired T test.

734 **Figure 2:** Binding of neuraminidase inhibitory antibodies to cells expressing NA Gly+/-  
735 proteins. (**A**) 3D model of N2 NA with (Left, 245 NA Gly+) or without (Right, 245 NA Gly-  
736 ) the predicted 245 N-glycan. Catalytic and framework residues are highlighted in cyan.  
737 Residues 245-247 are highlighted in red. Protein structure modeled and modified via  
738 UCSF Chimera, Protein Data Bank ID code 4GZP (Tanzania/2010 N2 NA). A typical  
739 complex style N-glycan was added via the Glyprot program. (**B-D**) 245 NA Gly+ (blue  
740 dots) or 245 NA Gly- (red dots) FLAG-tagged proteins expressed in HEK293T cells. NA  
741 expressing cells were incubated with dilutions of monoclonal antibodies HCA2 (**B**), 235-  
742 1C02 (**C**) or 229-1G03 (**D**) in addition to a mouse monoclonal antibody recognizing the  
743 FLAG epitope (to measure overall NA expression). Red lines indicate mAb binding to



744 cells expressing 245 NA Gly- protein. Blue lines indicate mAb binding to cells  
745 expressing 245 NA Gly+ protein. Representative data from 3 experiments. \*  $p < .05$  two-  
746 way repeated measures ANOVA with Bonferroni multiple comparison posttest.

747 **Figure 3:** Effect of 245 NA glycosylation on neuraminidase activity. The NA content in  
748 partially purified influenza virus particles was measured via SDS-PAGE and western  
749 blot (**A**) using HCA-2 mAb to detect NA and M1 antibody GTX125928 to detect M1.  
750 Numbers below protein bands indicate measured intensity. NA content was normalized  
751 to the M1 content of the same virus sample. With NA content normalized, the NA  
752 activity in the partially purified virus preparations was measured in the enzyme linked  
753 lectin assay (ELLA) (**B**), NA-STAR assay (**C**) and NA-Fluor MUNANA based assay (**D**).  
754 In B, C, and D, 245 NA Gly- enzymatic activity was set to 100. X axis label is viral NA  
755 genotype 245 NA Gly+ activity is graphed as a percentage of that activity. (**E**) To assess  
756 enzyme kinetics, 245 NA Gly- and 245 NA Gly+ viruses were incubated with a dilution of  
757 MUNANA substrate and fluorescence was measured every 60s for 1 hour. Initial  
758 velocity plotted as  $\mu\text{M}$  product generated per minute. Non-linear regression plotted (line)  
759 with individual values (points). \*  $p < .05$  unpaired T test. NA and M1 protein content in A  
760 were determined using ImageJ software. Enzyme kinetics was determined using a non-  
761 linear curve fit Michaelis-Menten equation in Graphpad prism 8.

762 **Figure 4:** Effect of inhibitory antibodies and human serum on NA enzymatic function  
763 ELLA and NA Star. Concentration of N2 monoclonal antibody needed to inhibit 50% of  
764 NA activity of 245 NA Gly+ and 245 NA Gly- viruses in NA-STAR (**A**) or ELLA (B) NA  
765 activity assays using partially purified H3N2 viruses. Upper limit of detection shown with

766 a dotted line in A and B, indicating the highest concentration of inhibitory antibody used  
767 (100nM). (C-E) NA inhibition (NAI) ELLA assay performed with human convalescent  
768 serum from patients with confirmed H3N2 infection using H6N2 recombinant viruses.  
769 Virus content equalized via plaque assay. Convalescent serum NAI assay from all  
770 patients with confirmed H3N2 infection (C) with NA Gly- virus (D), and NA Gly+ virus  
771 (E). X axis label indicates virus NA genotype. All patient serum samples with connecting  
772 lines between matched serum samples (F). Serum samples from the same individual  
773 are connected to indicate relative activity to the 245 NA Gly+ and 245 NA Gly- viruses.  
774 Dotted line shown is lower limit of detection in C-F, highest concentration of  
775 convalescent serum used (1:40 dilution). \*  $p < .05$  paired T-Test

776 **Figure 5:** Effect of neuraminidase activity inhibiting antibodies on virus growth. The  
777 concentration of anti-neuraminidase monoclonal antibody 235-1C02 (A) and 229-1G03  
778 (B) needed to neutralize 50% of the infectivity of 245 NA Gly – or 245 NA Gly+ viruses  
779 was determined on MDCK cells. Low MOI growth curve with recombinant viruses on  
780 MDCK cells (C-D). Hours post infection (HPI) on X axis, Log of TCID<sub>50</sub>/ml on Y axis.  
781 MDCK cells were infected with an MOI of .001 with either 245 NA Gly+ virus (C) or 245  
782 NA Gly- virus (D). After 1hr of incubation, viruses were treated with either human IgG  
783 isotype control (clone IGHG1), mAb 235-1C02 or mAb 229-1G03. Dotted line in A and B  
784 indicated upper limit of detection, highest concentration of mAb used (100nM). . \*  $p < .05$   
785 unpaired T test A and B. Dotted line in C and D indicated lower limit of detection, 2.37  
786 TCID<sub>50</sub>/ml. Data are pooled from 3 independent experiments with four replicates per  
787 virus per experiment (total n = 12 wells per virus timepoint) in C and D Error bars in C

788 and D is SEM. \*  $p < .05$  two way repeated measures ANOVA with Bonferroni multiple  
789 comparison posttest in C and D.

790

791

792

793

794

795

796

- 797 1. WHO. Influenza Seasonal Facts Sheet. Available online: [https://www.who.int/news-](https://www.who.int/news-room/fact-sheets/detail/influenza-(seasonal))  
798 [room/fact-sheets/detail/influenza-\(seasonal\)](https://www.who.int/news-room/fact-sheets/detail/influenza-(seasonal)). 2019.
- 799 2. Neu KE, Henry Dunand CJ, Wilson PC. Heads, stalks and everything else: how can  
800 antibodies eradicate influenza as a human disease? *Curr Opin Immunol*. 2016;42:48-55.
- 801 3. Kim H, Webster RG, Webby RJ. Influenza Virus: Dealing with a Drifting and Shifting  
802 Pathogen. *Viral Immunol*. 2018;31(2):174-83.
- 803 4. Estrada LD, Schultz-Cherry S. Development of a Universal Influenza Vaccine. *J*  
804 *Immunol*. 2019;202(2):392-8.
- 805 5. Sautto GA, Kirchenbaum GA, Ross TM. Towards a universal influenza vaccine: different  
806 approaches for one goal. *Virology*. 2018;15(1):17.
- 807 6. Jang YH, Seong BL. The Quest for a Truly Universal Influenza Vaccine. *Front Cell*  
808 *Infect Microbiol*. 2019;9:344.
- 809 7. McAuley JL, Gilbertson BP, Trifkovic S, Brown LE, McKimm-Breschkin JL. Influenza  
810 Virus Neuraminidase Structure and Functions. *Front Microbiol*. 2019;10:39.
- 811 8. Yang J, Liu S, Du L, Jiang S. A new role of neuraminidase (NA) in the influenza virus  
812 life cycle: implication for developing NA inhibitors with novel mechanism of action. *Rev Med*  
813 *Virology*. 2016;26(4):242-50.
- 814 9. Matrosovich MN, Matrosovich TY, Gray T, Roberts NA, Klenk HD. Neuraminidase is  
815 important for the initiation of influenza virus infection in human airway epithelium. *J Virol*.  
816 2004;78(22):12665-7.

- 817 10. Cohen M, Zhang XQ, Senaati HP, Chen HW, Varki NM, Schooley RT, et al. Influenza A  
818 penetrates host mucus by cleaving sialic acids with neuraminidase. *Virol J.* 2013;10:321.
- 819 11. Basak S, Tomana M, Compans RW. Sialic acid is incorporated into influenza  
820 hemagglutinin glycoproteins in the absence of viral neuraminidase. *Virus Res.* 1985;2(1):61-8.
- 821 12. Krammer F, Fouchier RAM, Eichelberger MC, Webby RJ, Shaw-Saliba K, Wan H, et al.  
822 NAction! How Can Neuraminidase-Based Immunity Contribute to Better Influenza Virus  
823 Vaccines? *MBio.* 2018;9(2).
- 824 13. Piepenbrink MS, Nogales A, Basu M, Fucile CF, Liesveld JL, Keefer MC, et al. Broad  
825 and Protective Influenza B Virus Neuraminidase Antibodies in Humans after Vaccination and  
826 their Clonal Persistence as Plasma Cells. *MBio.* 2019;10(2).
- 827 14. Sylte MJ, Suarez DL. Influenza neuraminidase as a vaccine antigen. *Curr Top Microbiol*  
828 *Immunol.* 2009;333:227-41.
- 829 15. Monto AS, Petrie JG, Cross RT, Johnson E, Liu M, Zhong W, et al. Antibody to  
830 Influenza Virus Neuraminidase: An Independent Correlate of Protection. *J Infect Dis.*  
831 2015;212(8):1191-9.
- 832 16. Gilbert PB, Fong Y, Juraska M, Carpp LN, Monto AS, Martin ET, et al. HAI and NAI  
833 titer correlates of inactivated and live attenuated influenza vaccine efficacy. *BMC Infect Dis.*  
834 2019;19(1):453.
- 835 17. Walz L, Kays SK, Zimmer G, von Messling V. Neuraminidase-Inhibiting Antibody  
836 Titers Correlate with Protection from Heterologous Influenza Virus Strains of the Same  
837 Neuraminidase Subtype. *J Virol.* 2018;92(17).
- 838 18. Doyle TM, Li C, Bucher DJ, Hashem AM, Van Domselaar G, Wang J, et al. A  
839 monoclonal antibody targeting a highly conserved epitope in influenza B neuraminidase provides  
840 protection against drug resistant strains. *Biochem Biophys Res Commun.* 2013;441(1):226-9.
- 841 19. Doyle TM, Jaentschke B, Van Domselaar G, Hashem AM, Farnsworth A, Forbes NE, et  
842 al. The universal epitope of influenza A viral neuraminidase fundamentally contributes to  
843 enzyme activity and viral replication. *J Biol Chem.* 2013;288(25):18283-9.
- 844 20. Chen YQ, Wohlbold TJ, Zheng NY, Huang M, Huang Y, Neu KE, et al. Influenza  
845 Infection in Humans Induces Broadly Cross-Reactive and Protective Neuraminidase-Reactive  
846 Antibodies. *Cell.* 2018;173(2):417-29 e10.
- 847 21. Kosik I, Angeletti D, Gibbs JS, Angel M, Takeda K, Kosikova M, et al. Neuraminidase  
848 inhibition contributes to influenza A virus neutralization by anti-hemagglutinin stem antibodies.  
849 *J Exp Med.* 2019;216(2):304-16.
- 850 22. Eichelberger MC, Monto AS. Neuraminidase, the Forgotten Surface Antigen, Emerges as  
851 an Influenza Vaccine Target for Broadened Protection. *J Infect Dis.*  
852 2019;219(Supplement\_1):S75-S80.
- 853 23. Jiang L, Fantoni G, Couzens L, Gao J, Plant E, Ye Z, et al. Comparative Efficacy of  
854 Monoclonal Antibodies That Bind to Different Epitopes of the 2009 Pandemic H1N1 Influenza  
855 Virus Neuraminidase. *J Virol.* 2016;90(1):117-28.
- 856 24. Eichelberger MC, Wan H. Influenza neuraminidase as a vaccine antigen. *Curr Top*  
857 *Microbiol Immunol.* 2015;386:275-99.
- 858 25. Yasuhara A, Yamayoshi S, Kiso M, Sakai-Tagawa Y, Koga M, Adachi E, et al.  
859 Antigenic drift originating from changes to the lateral surface of the neuraminidase head of  
860 influenza A virus. *Nat Microbiol.* 2019;4(6):1024-34.

- 861 26. Gao J, Couzens L, Burke DF, Wan H, Wilson P, Memoli MJ, et al. Antigenic Drift of the  
862 Influenza A(H1N1)pdm09 Virus Neuraminidase Results in Reduced Effectiveness of  
863 A/California/7/2009 (H1N1pdm09)-Specific Antibodies. *MBio*. 2019;10(2).
- 864 27. Sandbulte MR, Westgeest KB, Gao J, Xu X, Klimov AI, Russell CA, et al. Discordant  
865 antigenic drift of neuraminidase and hemagglutinin in H1N1 and H3N2 influenza viruses. *Proc*  
866 *Natl Acad Sci U S A*. 2011;108(51):20748-53.
- 867 28. Wan H, Gao J, Yang H, Yang S, Harvey R, Chen YQ, et al. The neuraminidase of  
868 A(H3N2) influenza viruses circulating since 2016 is antigenically distinct from the A/Hong  
869 Kong/4801/2014 vaccine strain. *Nat Microbiol*. 2019;4(12):2216-25.
- 870 29. Matrosovich M, Matrosovich T, Carr J, Roberts NA, Klenk HD. Overexpression of the  
871 alpha-2,6-sialyltransferase in MDCK cells increases influenza virus sensitivity to neuraminidase  
872 inhibitors. *J Virol*. 2003;77(15):8418-25.
- 873 30. Couzens L, Gao J, Westgeest K, Sandbulte M, Lugovtsev V, Fouchier R, et al. An  
874 optimized enzyme-linked lectin assay to measure influenza A virus neuraminidase inhibition  
875 antibody titers in human sera. *J Virol Methods*. 2014;210:7-14.
- 876 31. Lambre CR, Terzidis H, Greffard A, Webster RG. Measurement of anti-influenza  
877 neuraminidase antibody using a peroxidase-linked lectin and microtitre plates coated with natural  
878 substrates. *J Immunol Methods*. 1990;135(1-2):49-57.
- 879 32. Kosik I, Yewdell JW. Influenza A virus hemagglutinin specific antibodies interfere with  
880 virion neuraminidase activity via two distinct mechanisms. *Virology*. 2017;500:178-83.
- 881 33. Jegaskanda S, Reading PC, Kent SJ. Influenza-specific antibody-dependent cellular  
882 cytotoxicity: toward a universal influenza vaccine. *J Immunol*. 2014;193(2):469-75.
- 883 34. Yang X, Steukers L, Forier K, Xiong R, Braeckmans K, Van Reeth K, et al. A  
884 beneficiary role for neuraminidase in influenza virus penetration through the respiratory mucus.  
885 *PLoS One*. 2014;9(10):e110026.
- 886 35. Wagner R, Matrosovich M, Klenk HD. Functional balance between haemagglutinin and  
887 neuraminidase in influenza virus infections. *Rev Med Virol*. 2002;12(3):159-66.
- 888 36. Gaymard A, Le Briand N, Frobert E, Lina B, Escuret V. Functional balance between  
889 neuraminidase and haemagglutinin in influenza viruses. *Clin Microbiol Infect*. 2016;22(12):975-  
890 83.
- 891 37. Lai JCC, Karunarathna H, Wong HH, Peiris JSM, Nicholls JM. Neuraminidase activity  
892 and specificity of influenza A virus are influenced by haemagglutinin-receptor binding. *Emerg*  
893 *Microbes Infect*. 2019;8(1):327-38.
- 894 38. Mitnaul LJ, Matrosovich MN, Castrucci MR, Tuzikov AB, Bovin NV, Kobasa D, et al.  
895 Balanced hemagglutinin and neuraminidase activities are critical for efficient replication of  
896 influenza A virus. *J Virol*. 2000;74(13):6015-20.
- 897 39. Du R, Cui Q, Rong L. Competitive Cooperation of Hemagglutinin and Neuraminidase  
898 during Influenza A Virus Entry. *Viruses*. 2019;11(5).
- 899 40. Zanin M, Baviskar P, Webster R, Webby R. The Interaction between Respiratory  
900 Pathogens and Mucus. *Cell Host Microbe*. 2016;19(2):159-68.
- 901 41. Eichelberger MC, Morens DM, Taubenberger JK. Neuraminidase as an influenza vaccine  
902 antigen: a low hanging fruit, ready for picking to improve vaccine effectiveness. *Curr Opin*  
903 *Immunol*. 2018;53:38-44.
- 904 42. Stadlbauer D, Zhu X, McMahon M, Turner JS, Wohlbold TJ, Schmitz AJ, et al. Broadly  
905 protective human antibodies that target the active site of influenza virus neuraminidase. *Science*.  
906 2019;366(6464):499-504.

- 907 43. Sultana I, Yang K, Getie-Kehtie M, Couzens L, Markoff L, Alterman M, et al. Stability  
908 of neuraminidase in inactivated influenza vaccines. *Vaccine*. 2014;32(19):2225-30.
- 909 44. Powers DC, Kilbourne ED, Johansson BE. Neuraminidase-specific antibody responses to  
910 inactivated influenza virus vaccine in young and elderly adults. *Clin Diagn Lab Immunol*.  
911 1996;3(5):511-6.
- 912 45. Fischer WA, 2nd, King LS, Lane AP, Pekosz A. Restricted replication of the live  
913 attenuated influenza A virus vaccine during infection of primary differentiated human nasal  
914 epithelial cells. *Vaccine*. 2015;33(36):4495-504.
- 915 46. Ramanathan M, Jr., Lane AP. Innate immunity of the sinonasal cavity and its role in  
916 chronic rhinosinusitis. *Otolaryngol Head Neck Surg*. 2007;136(3):348-56.
- 917 47. Wohlgemuth N, Ye Y, Fenstermacher KJ, Liu H, Lane AP, Pekosz A. The M2 protein of  
918 live, attenuated influenza vaccine encodes a mutation that reduces replication in human nasal  
919 epithelial cells. *Vaccine*. 2017;35(48 Pt B):6691-9.
- 920 48. Zou S, Gao R, Zhang Y, Li X, Chen W, Bai T, et al. Molecular characterization of H6  
921 subtype influenza viruses in southern China from 2009 to 2011. *Emerg Microbes Infect*.  
922 2016;5(7):e73.
- 923 49. Ibricevic A, Pekosz A, Walter MJ, Newby C, Battaile JT, Brown EG, et al. Influenza  
924 virus receptor specificity and cell tropism in mouse and human airway epithelial cells. *J Virol*.  
925 2006;80(15):7469-80.
- 926 50. Neumann G, Watanabe T, Ito H, Watanabe S, Goto H, Gao P, et al. Generation of  
927 influenza A viruses entirely from cloned cDNAs. *Proc Natl Acad Sci U S A*. 1999;96(16):9345-  
928 50.
- 929 51. Wohlgemuth N, Lane AP, Pekosz A. Influenza A Virus M2 Protein Apical Targeting Is  
930 Required for Efficient Virus Replication. *J Virol*. 2018;92(22).
- 931 52. NIH. ImageJ 2020 [Available from: <https://imagej.nih.gov/ij/>].
- 932 53. Marathe BM, Leveque V, Klumpp K, Webster RG, Govorkova EA. Determination of  
933 neuraminidase kinetic constants using whole influenza virus preparations and correction for  
934 spectroscopic interference by a fluorogenic substrate. *PLoS One*. 2013;8(8):e71401.

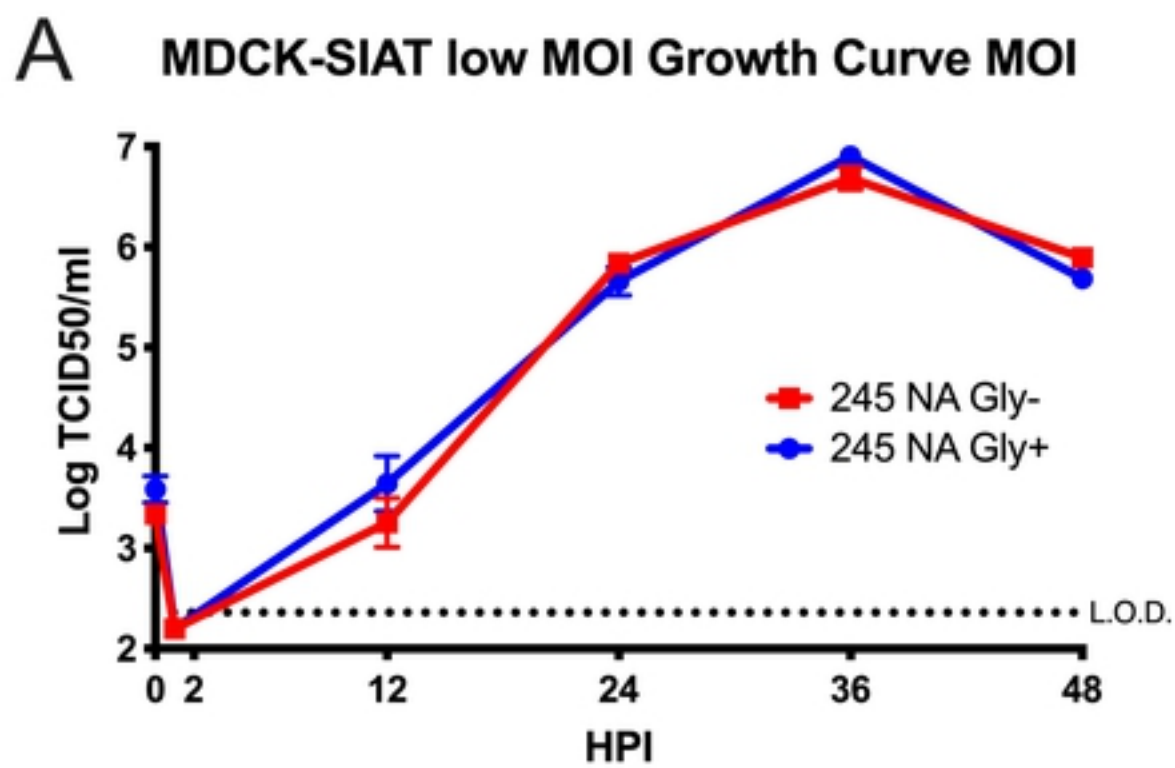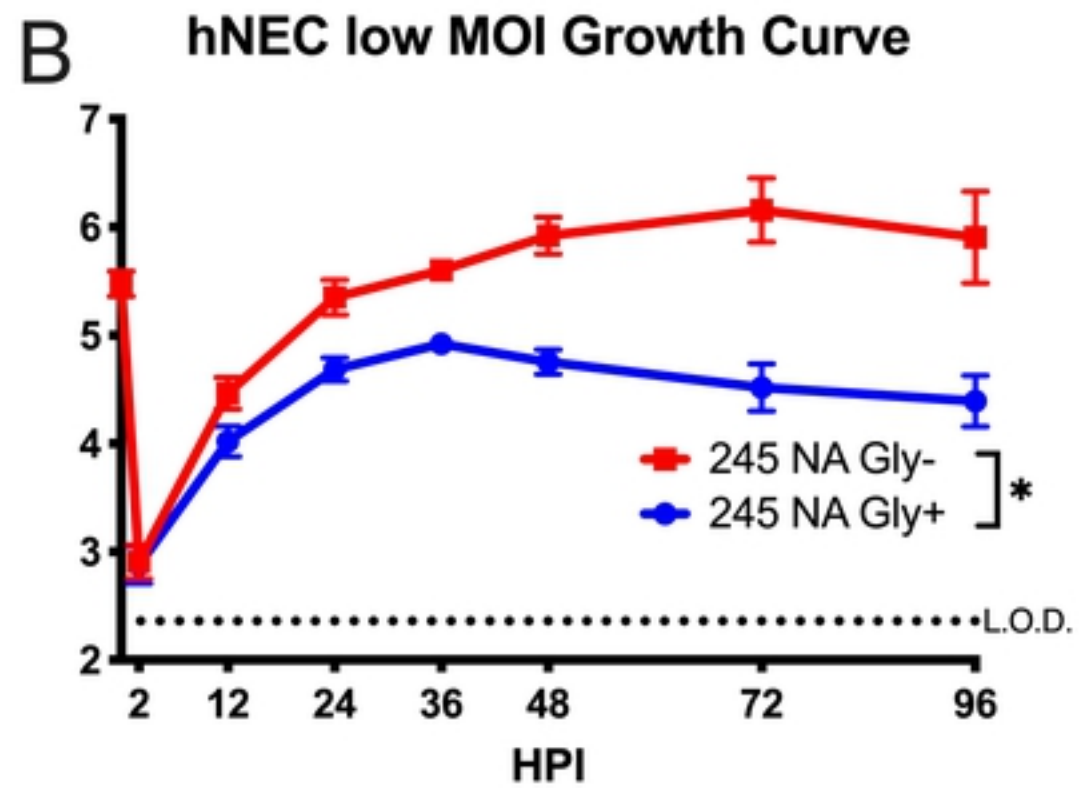

**C**

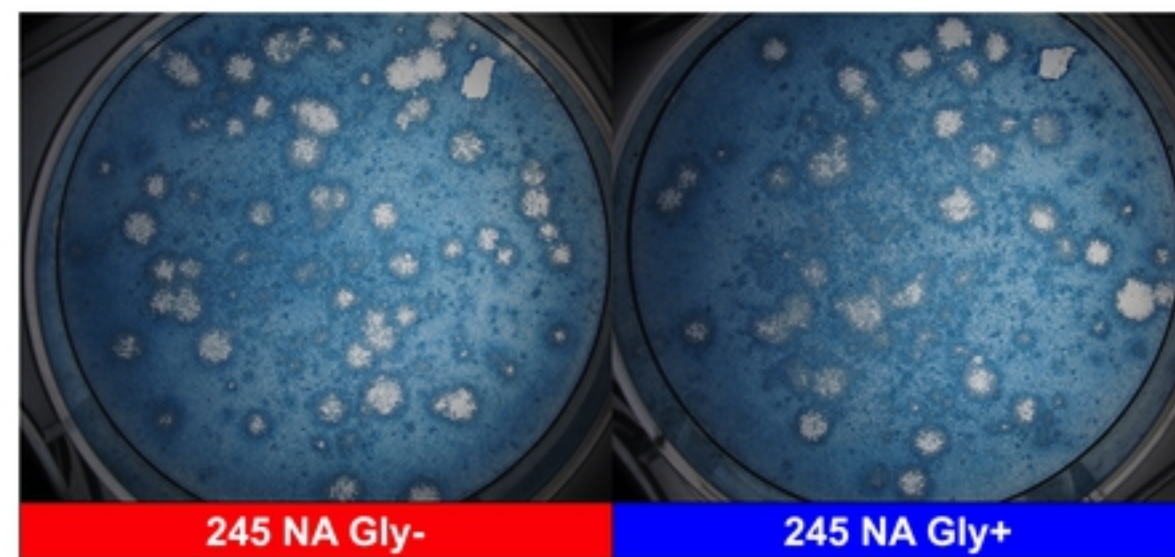

**D**

**Plaque Area Quantification**

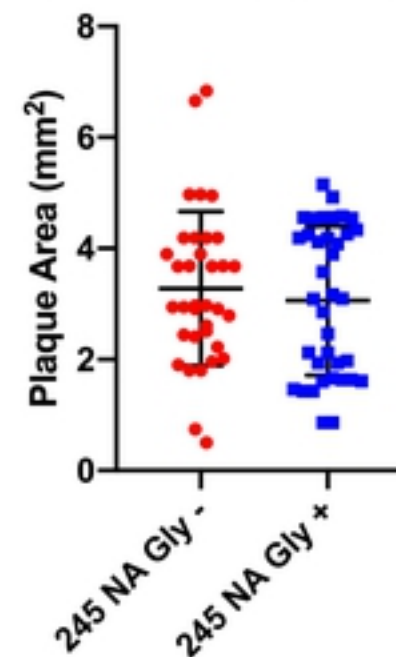

Figure 1

**A****245 NA Gly+ 3D Model**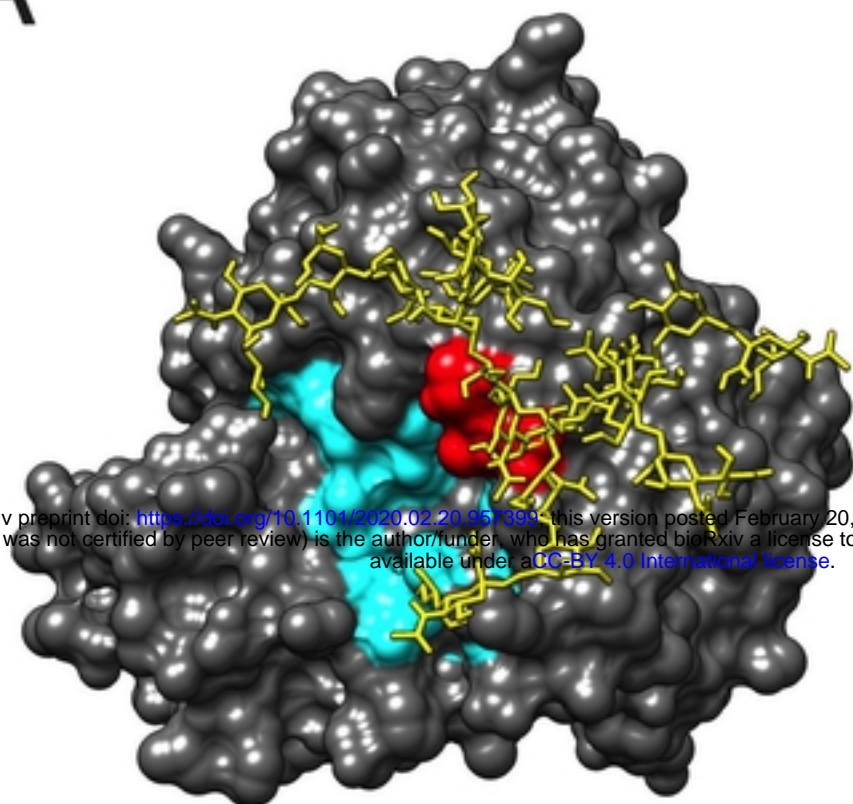**245 NA Gly- 3D Model**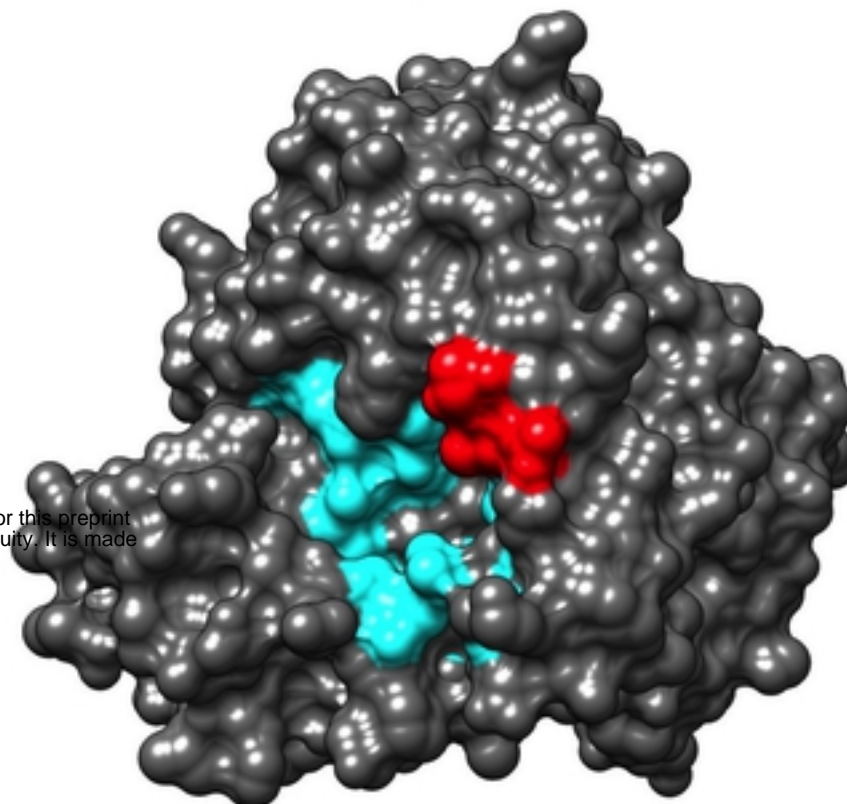**B****HCA-2 Binding to NA Expressing Cells**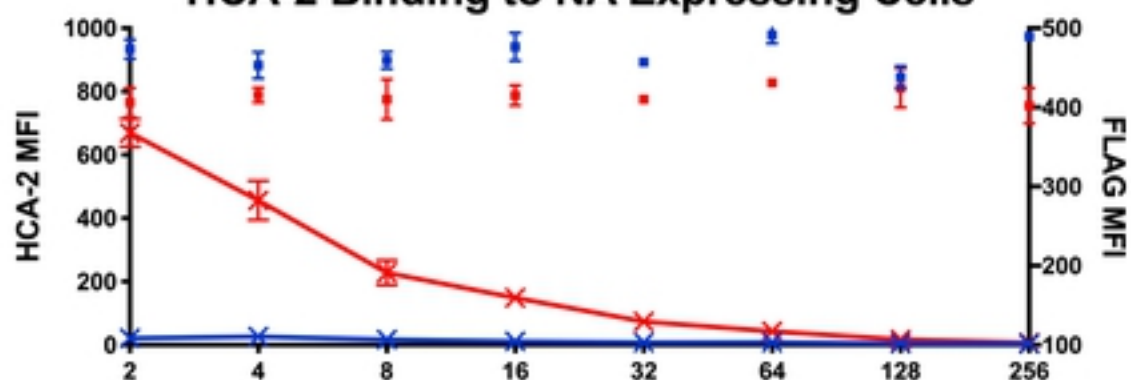**C****235-1C02 Binding to NA Expressing Cells**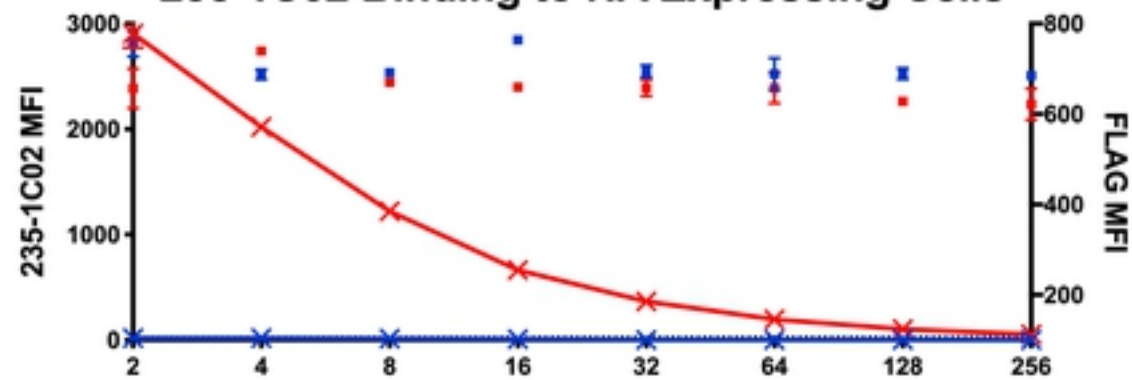**D****229-1G03 Binding to NA Expressing Cells**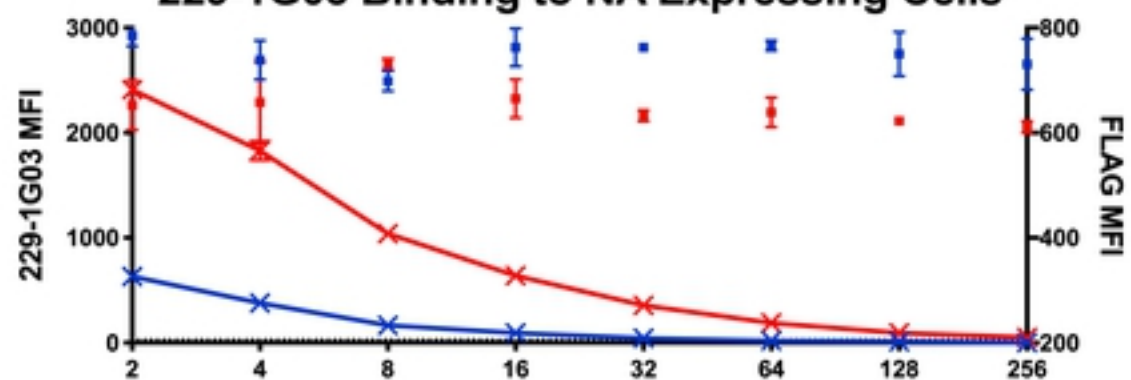

- NA expression 245 NA Gly-
- NA expression 245 NA Gly+
- ✗ mAb Binding 245 NA Gly-
- ✗ mAb Binding 245 NA Gly+

**Figure 2**



**A****Virus Particle Western Blot**

bioRxiv preprint doi: <https://doi.org/10.1101/2020.02.20.957399>; this version posted February 20, 2020. The copyright holder for this preprint (which was not certified by peer review) is the author/funder, who has granted bioRxiv a license to display the preprint in perpetuity. It is made available under aCC-BY 4.0 International license.

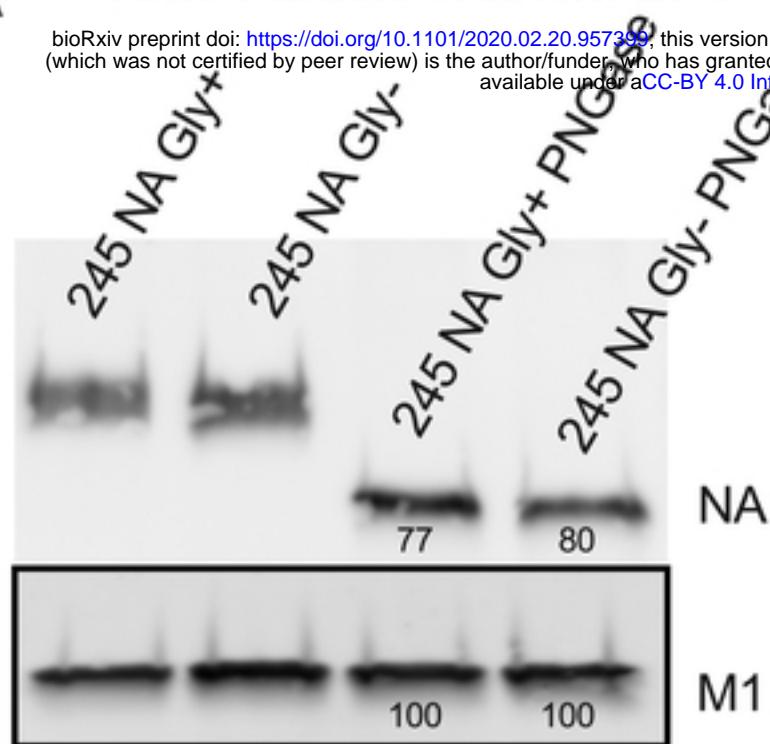**B****ELLA NA Activity**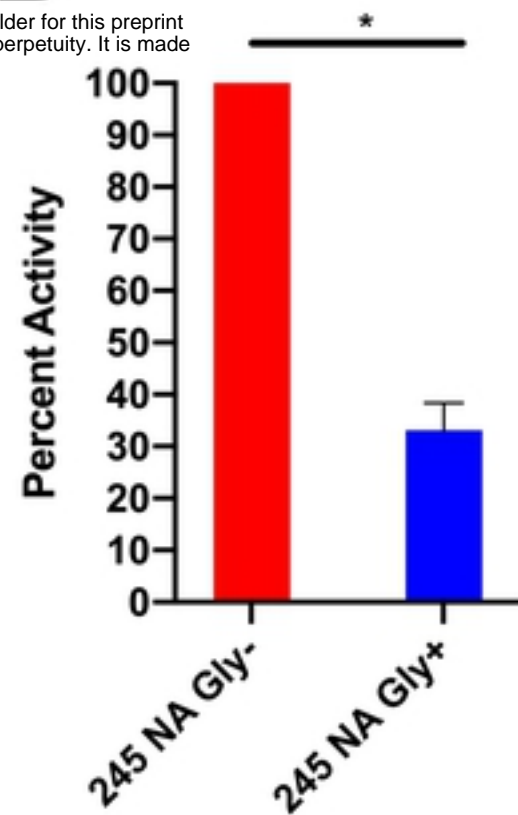**C****NA-Star NA Activity**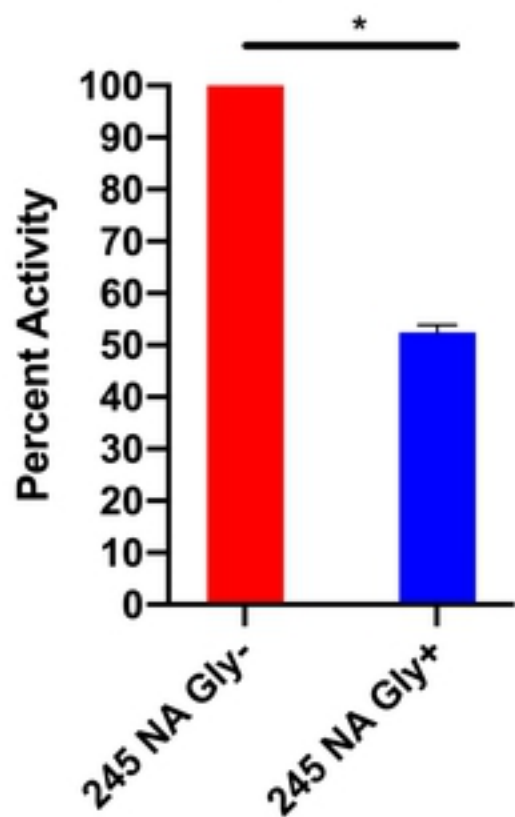**D****NA-Star NA Activity**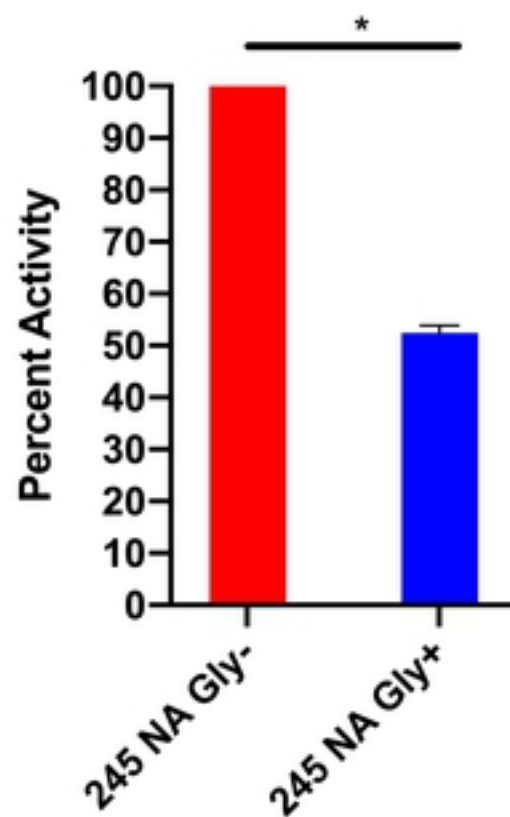**E****Enzyme Initial Velocity**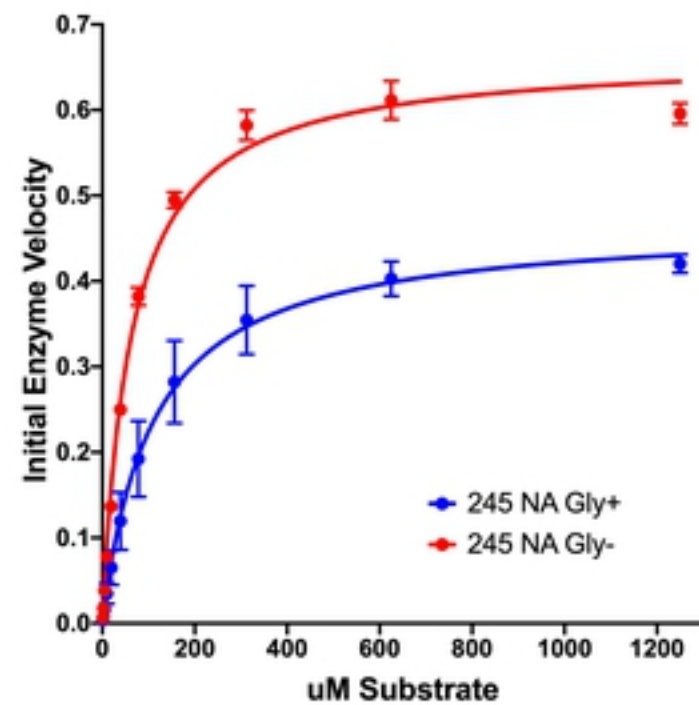

Figure 3

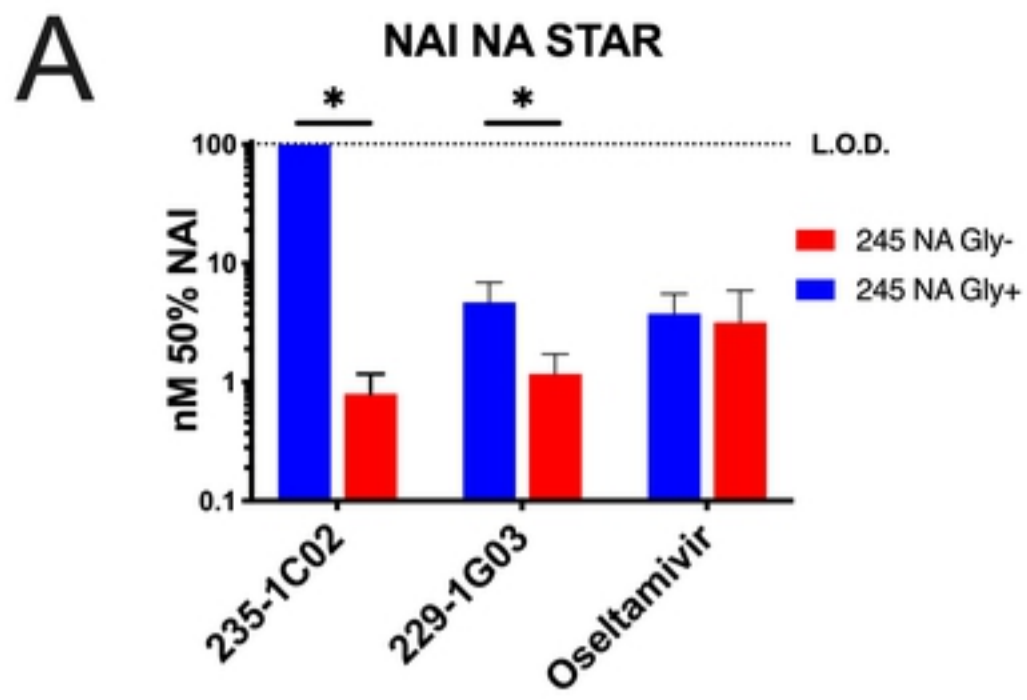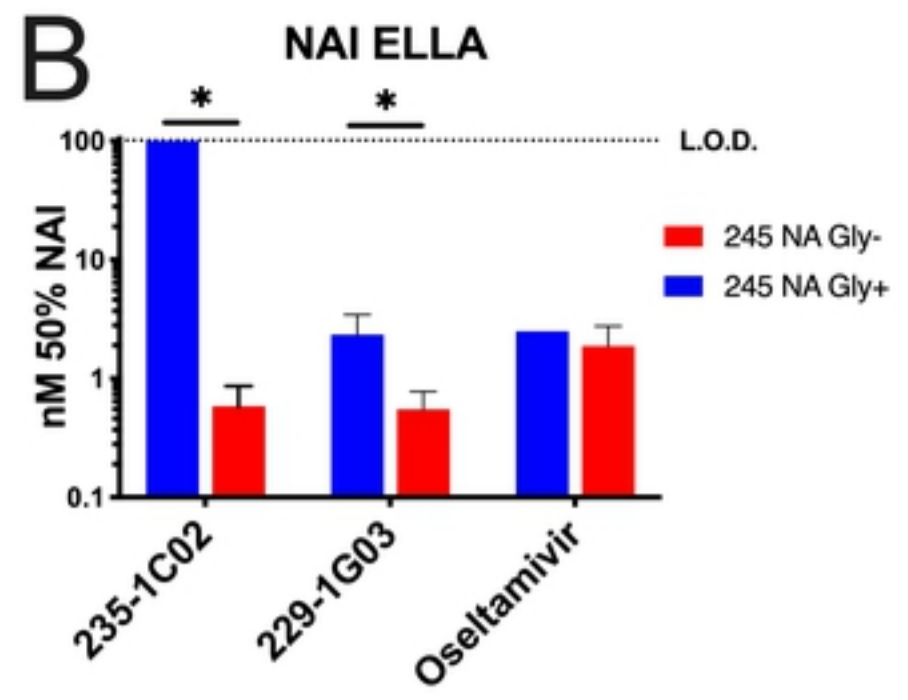

bioRxiv preprint doi: <https://doi.org/10.1101/2020.02.20.957399>; this version posted February 20, 2020. The copyright holder for this preprint (which was not certified by peer review) is the author/funder, who has granted bioRxiv a license to display the preprint in perpetuity. It is made available under aCC-BY 4.0 International license.

**C** NAI ELLA Human NA Gly- Serum

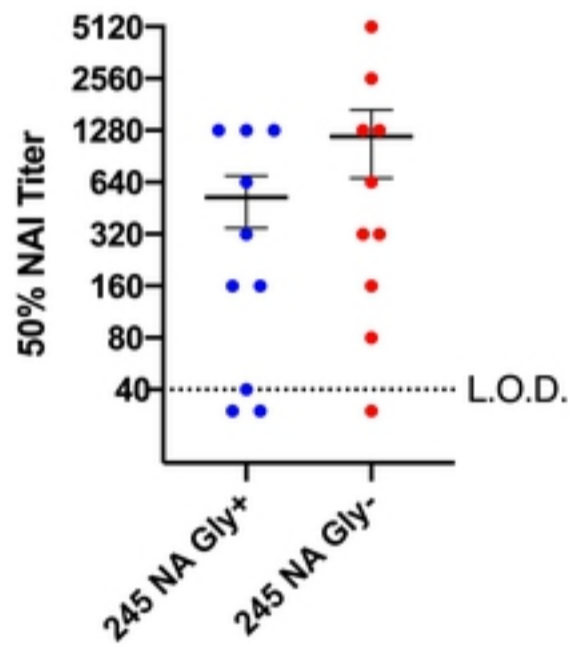

**D** NAI ELLA Human NA Gly+ Serum

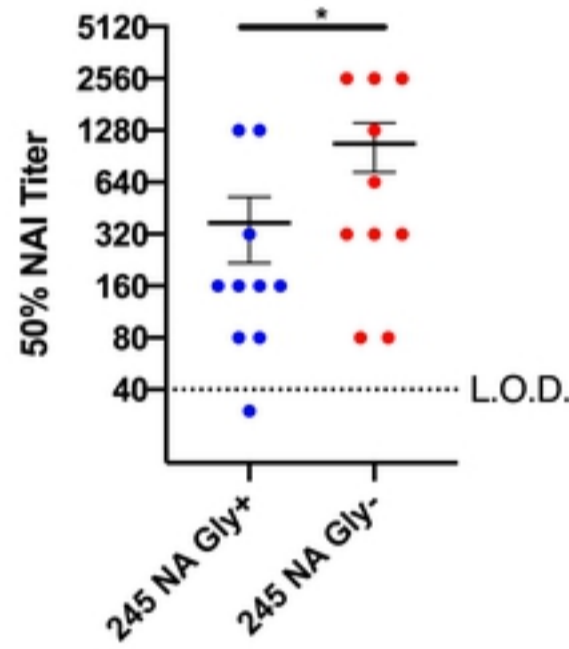

**E** NAI ELLA Human NA Gly+ Serum

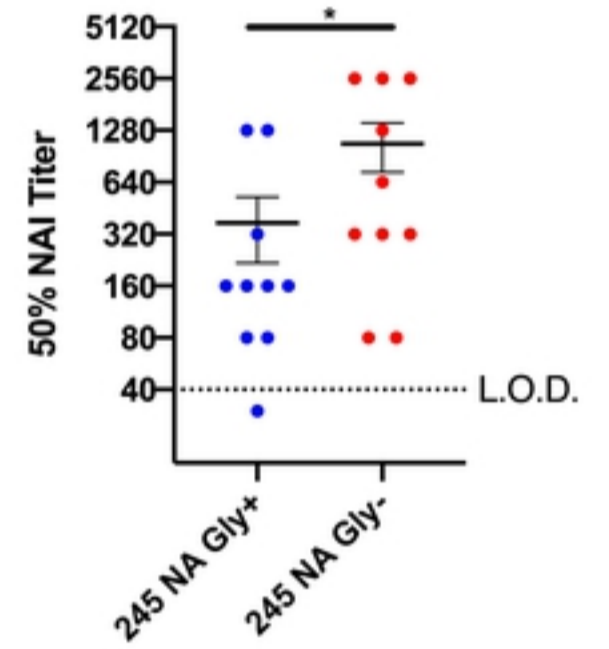

**F** NAI ELLA Human Serum

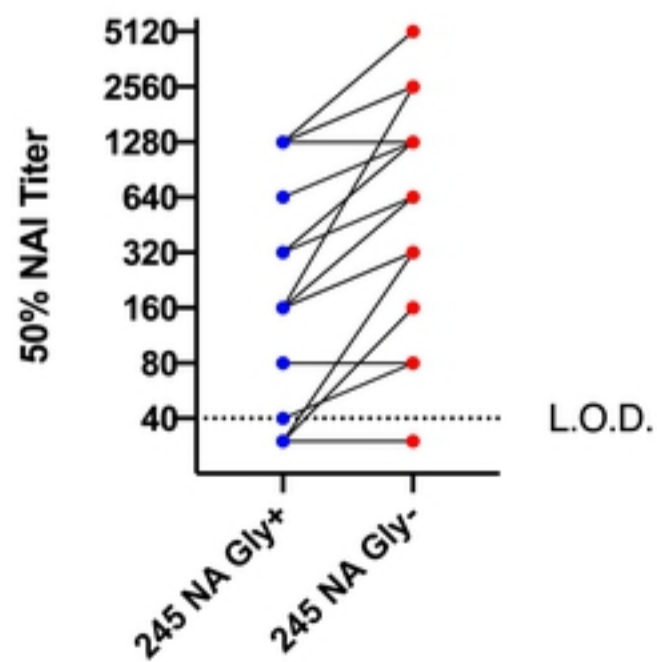

Figure 4

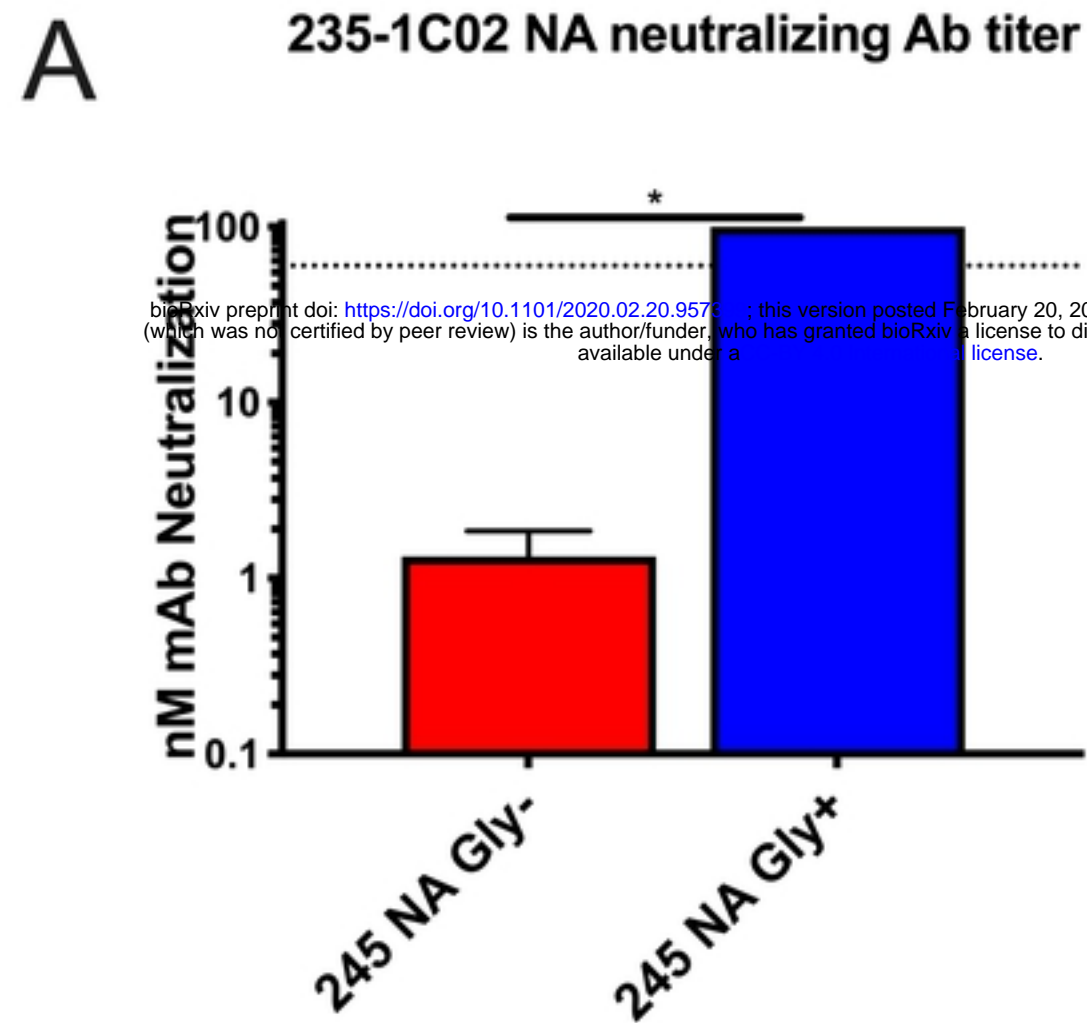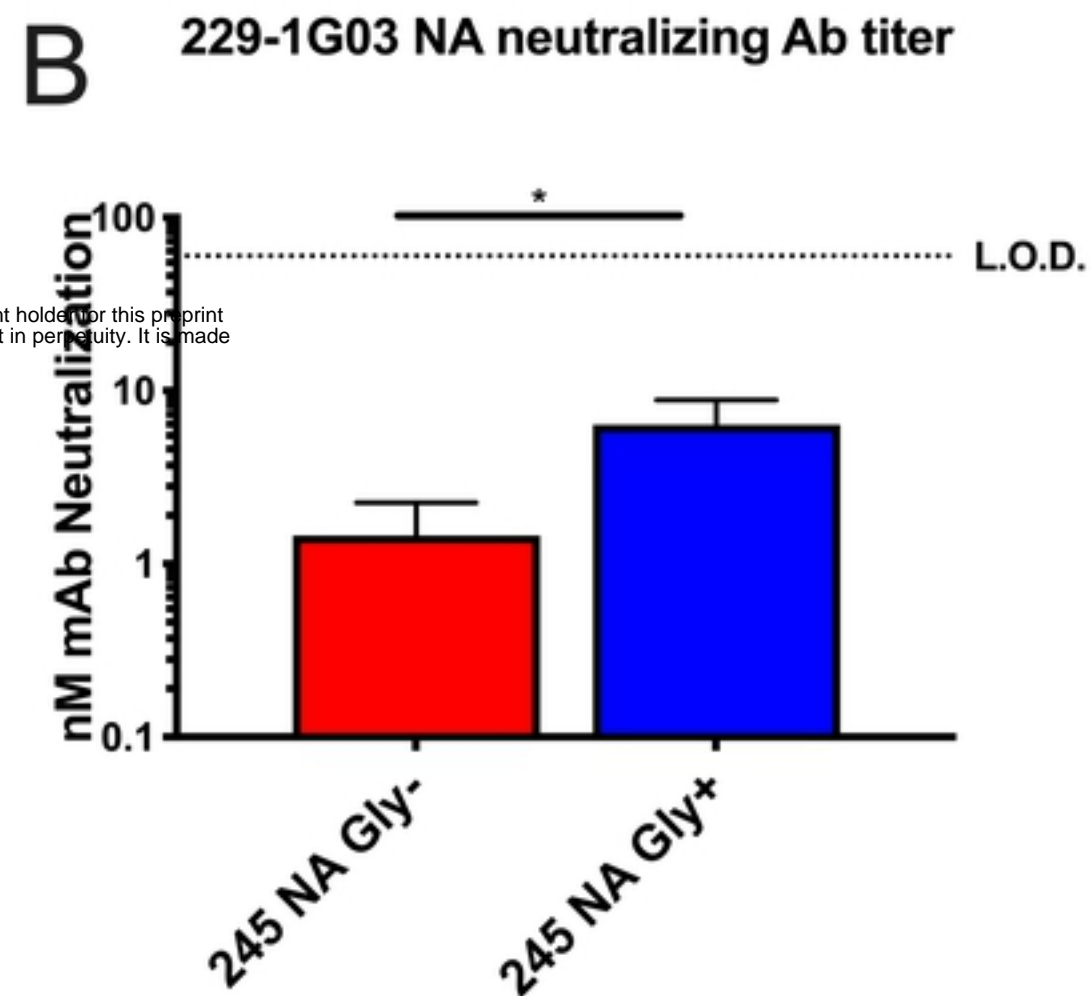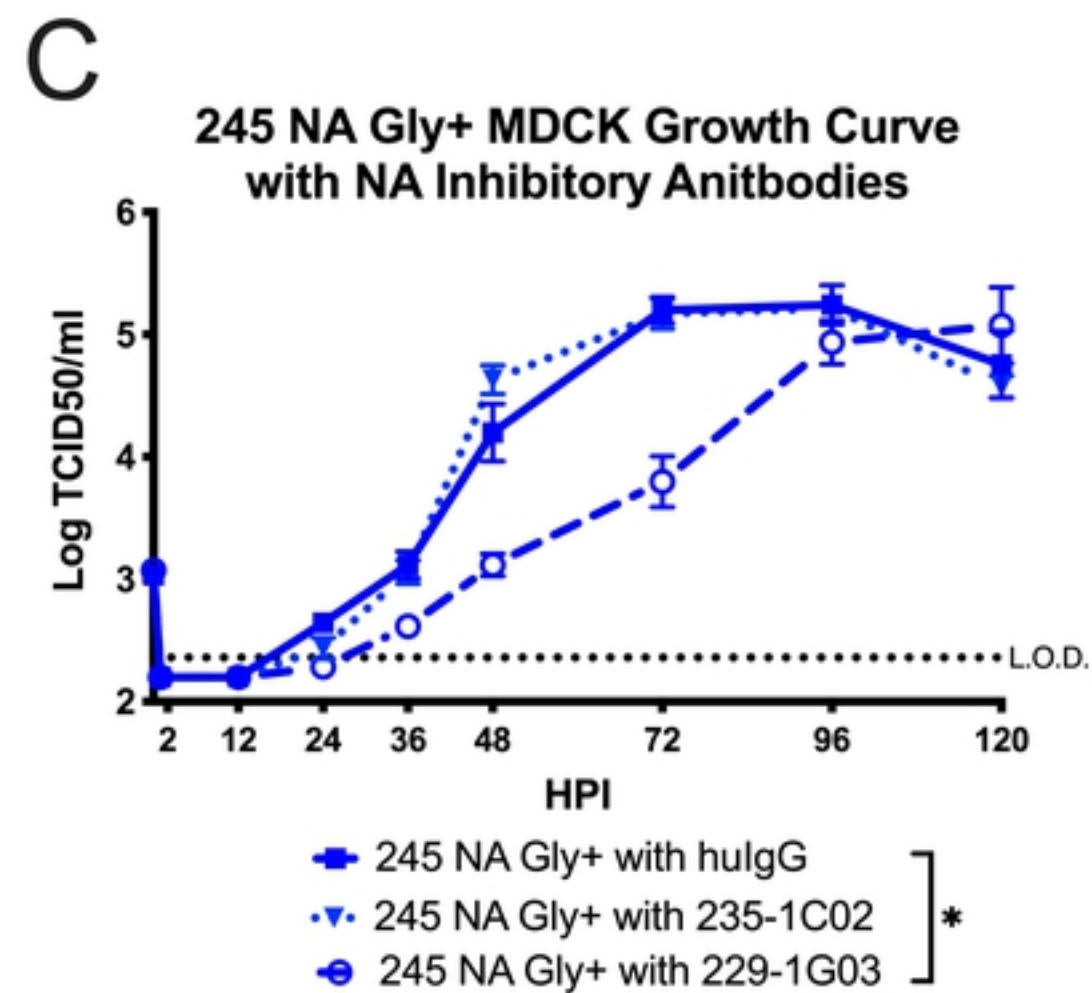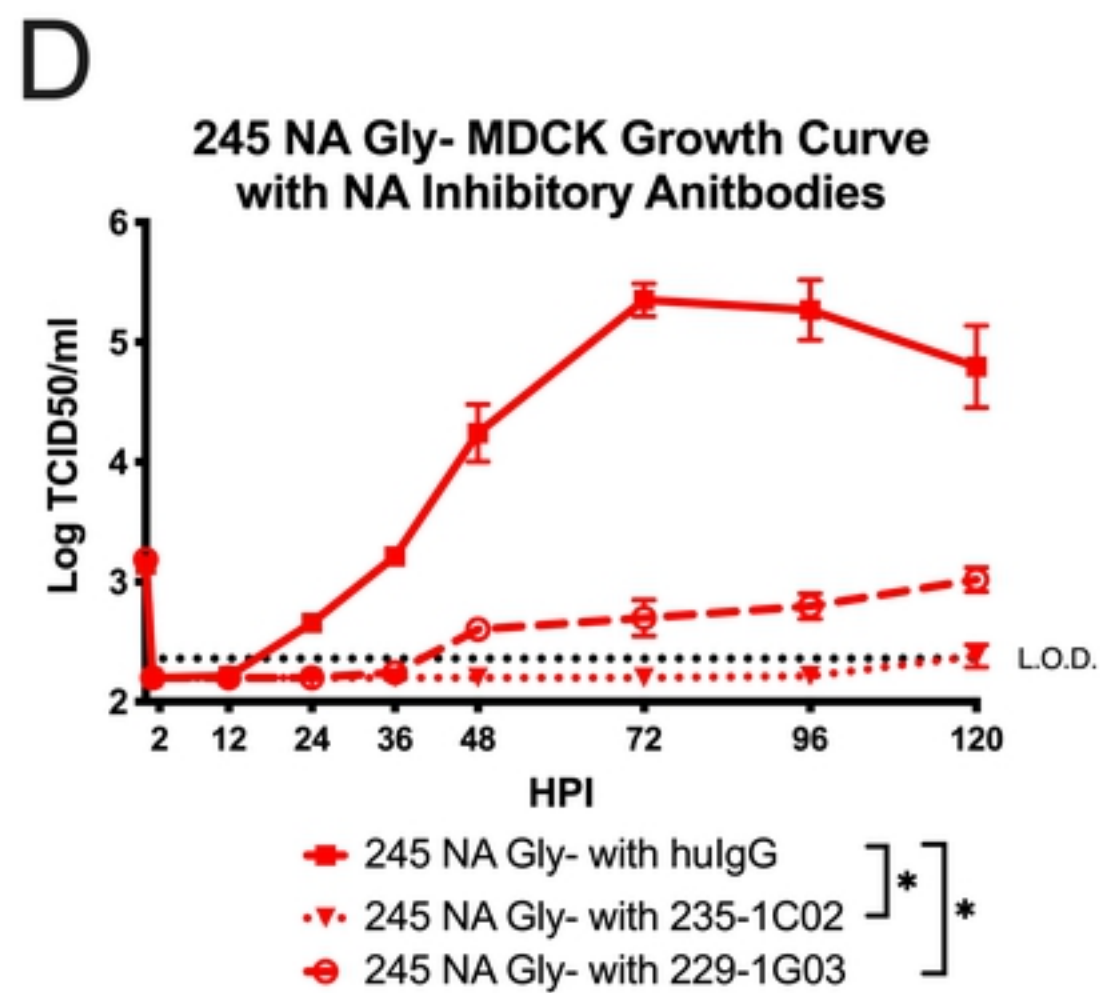

Figure 5
